# Supplementary material for: Randomized Trial of Metformin, Ivermectin, and Fluvoxamine for Covid-19
Source: Atypon-hosted journal article supplement (doi:10.1056/nejmoa2201662), 2022-08-17
Supplement: nejmoa2201662_appendix.pdf [file nejmoa2201662_appendix.pdf]

## Supplementary Appendix

Supplement to: Bramante CT, Huling JD, Tignanelli CJ, et al. Randomized trial of metformin, ivermectin, and fluvoxamine for Covid-19. *N Engl J Med* 2022;387:599-610. DOI: 10.1056/NEJMoa2201662

This appendix has been provided by the authors to give readers additional information about the work.

## Supplementary Appendix, COVID-OUT Study

### TABLE OF CONTENTS

|       |                                                                                                     |    |
|-------|-----------------------------------------------------------------------------------------------------|----|
| 1     | List of Investigators                                                                               | 3  |
| 2     | Supplementary Methods                                                                               | 5  |
| 2.1   | Full Inclusion and Exclusion Criteria                                                               | 5  |
| 2.1.1 | Inclusion Criteria                                                                                  | 5  |
| 2.1.2 | Exclusion Criteria                                                                                  | 5  |
| 2.2   | Reasons for Trial Exclusion                                                                         | 6  |
| 2.3   | Randomization Details                                                                               | 7  |
| 2.4   | Sample Size Considerations                                                                          | 8  |
| 2.5   | Outcome Assessments                                                                                 | 9  |
| 2.6   | Handling of Missing Data                                                                            | 10 |
| 2.7   | Study Medication Dosing (and for exact-matching placebo)                                            | 11 |
| 2.7.1 | Metformin                                                                                           | 11 |
| 2.7.2 | Ivermectin Dosing                                                                                   | 11 |
| 2.7.3 | Fluvoxamine Dosing                                                                                  | 11 |
| 3     | Supplementary Figures                                                                               | 12 |
| 3.1   | Figure S1A. Effect of metformin vs. control for the primary outcome, overall and by subgroups.      | 12 |
| 3.2   | Figure S1B. Effect of ivermectin vs. control for the primary outcome, overall and by subgroups.     | 13 |
| 3.3   | Figure S1C. Effect of fluvoxamine vs. control for the primary outcome, overall and by subgroups.    | 14 |
| 3.4   | Figure S2A. Effect of metformin vs. control for healthcare utilization, overall and by subgroups.   | 15 |
| 3.5   | Figure S2B. Effect of ivermectin vs control for healthcare utilization, overall and by subgroups.   | 16 |
| 3.6   | Figure S2C. Effect of fluvoxamine vs. control for healthcare utilization, overall and by subgroups. | 17 |
| 3.7   | Figure S3. Venn Diagram of Components of Primary Composite Endpoint                                 | 18 |
| 3.8   | Figure S4. Covid-19 Specific Symptoms over Time by Study Medicine                                   | 19 |
| 3.8.1 | Data Table for Manuscript Figure 2, the Mean ( $\pm$ SD) total symptom severity score               | 19 |
| 3.9   | Figures S5. Individual Symptom Severity over time                                                   | 20 |
| 3.9.1 | Figures S5.A-D. Symptoms over Time: Rhinorrhea, Sore Throat, Dyspnea, Cough                         | 20 |
| 3.9.2 | Figures S5.E-H. Symptoms over time: Fatigue, Myalgia, Headache, Chills                              | 21 |
| 3.9.3 | Figures S5.I-L. Symptoms over time: Fever, Nausea, Vomiting, Diarrhea                               | 22 |
| 3.9.4 | Figure S5.M. Symptoms over time: Loss of Smell                                                      | 23 |
| 3.9.5 | Figure S5.N. Symptoms over time: Loss of Taste                                                      | 24 |
| 3.10  | Figure S6. Factorial Interaction of Combination Therapy                                             | 25 |
| 3.11  | Figure S7. Maximum Clinical Support over 14-days in ordinal scale                                   | 26 |
| 3.12  | Figure S8. Maximum Clinical Support over 28-days in ordinal scale                                   | 27 |
| 3.13  | Figure S8. Time to Study Drug Initiation over Time                                                  | 28 |

|      |                                                                                                                                                 |    |
|------|-------------------------------------------------------------------------------------------------------------------------------------------------|----|
| 3.14 | Figure S9. Pictures of Study Medicine and Matched Placebo                                                                                       | 29 |
| 4    | Supplementary Tables                                                                                                                            | 30 |
| 4.1  | Table S1. Study Medication Adherence                                                                                                            | 30 |
| 4.2  | Table S2. Study Medication Interruption, Missed Doses, and/or Discontinuation                                                                   | 31 |
| 4.3  | Table S3. Additional Open-label Therapeutics Utilized after Randomization                                                                       | 32 |
| 4.4  | Table S4. Complete Case Analysis of the primary outcome in the modified intention to treat population.                                          | 33 |
| 4.5  | Table S5. Comparison of Background Information on race, ethnicity, age, sex of the broader population affected by SARS-CoV-2 based on CDC data. | 34 |
| 5    | Intention to treat (ITT) analyses                                                                                                               | 35 |
| 5.1  | Table S6. Baseline characteristics of participants who were randomized but not included in the modified intention to treat analysis             | 35 |
| 5.2  | Table S7: Intent-to-Treat (ITT) analysis of the primary outcome with imputation.                                                                | 36 |
| 6    | Data Safety Monitoring Board                                                                                                                    | 37 |
| 7.   | Investigational Drug Services Datasheet                                                                                                         | 38 |
| 8.   | Acknowledgements                                                                                                                                | 41 |
| 9.   | Appendix References                                                                                                                             | 41 |

# 1 List of Investigators

## COVID-OUT Study Team

| Name                 | Institute                                 | Location        |
|----------------------|-------------------------------------------|-----------------|
| Blake Anderson       | Emory                                     | Atlanta, GA     |
| Riannon C Atwater    | University of Colorado                    | Aurora, CO      |
| Nandini Avula        | University of Minnesota                   | Minneapolis, MN |
| Kenny B Beckman      | University of Minnesota                   | Minneapolis, MN |
| Hrishikesh K Belani  | Olive View - UCLA                         | Sylmar, CA      |
| David R Boulware     | University of Minnesota                   | Minneapolis, MN |
| Carolyn T Bramante   | University of Minnesota                   | Minneapolis, MN |
| Jannis Brea          | Northwestern University                   | Chicago, IL     |
| Courtney A Broedlow  | University of Minnesota                   | Minneapolis, MN |
| John B Buse          | University of North Carolina              | Chapel Hill, NC |
| Paula Campora        | University of Minnesota                   | Minneapolis, MN |
| Jill Charles         | University of Minnesota                   | Minneapolis, MN |
| Grace Christensen    | University of Minnesota                   | Minneapolis, MN |
| Theresa Christiansen | M Health Fairview                         | Minneapolis, MN |
| Ken Cohen            | Optum                                     | Minnetonka, MN  |
| Bo Connelly          | University of Minnesota                   | Minneapolis, MN |
| Srijani Datta        | University of Minnesota                   | Minneapolis, MN |
| Nikita Deng          | University of Colorado                    | Aurora, CO      |
| Alex T Dunn          | Hennepin Healthcare                       | Minneapolis, MN |
| Spencer M Erickson   | University of Minnesota                   | Minneapolis, MN |
| Faith M Fairbairn    | University of Minnesota                   | Minneapolis, MN |
| Sarah L Fenno        | University of Minnesota                   | Minneapolis, MN |
| Daniel J Fraser      | University of Minnesota                   | Minneapolis, MN |
| Regina D Friction    | Feinberg School of Medicine, Northwestern | Chicago, IL     |
| Gwen Griffiths       | University of Minnesota                   | Minneapolis, MN |
| Aubrey A Hagen       | University of Minnesota                   | Minneapolis, MN |
| Katrina M Hartman    | University of Minnesota                   | Minneapolis, MN |
| Audrey F Hendrickson | Hennepin Healthcare                       | Minneapolis, MN |
| Jared D Huling       | University of Minnesota                   | Minneapolis, MN |
| Nicholas E Ingraham  | University of Minnesota                   | Minneapolis, MN |
| Arthur C Jeng        | Olive View - UCLA                         | Sylmar, CA      |
| Darrell M Johnson    | University of Minnesota                   | Minneapolis, MN |
| Amy B Karger         | University of Minnesota                   | Minneapolis, MN |
| Nichole R Klatt      | University of Minnesota                   | Minneapolis, MN |
| Erik A Kuehl         | M Health Fairview                         | Minneapolis, MN |
| Derek D LaBar        | M Health Fairview                         | Minneapolis, MN |
| Samuel Lee           | Feinberg School of Medicine, Northwestern | Chicago, IL     |
| David M Liebovitz    | Feinberg School of Medicine, Northwestern | Chicago, IL     |
| Sarah Lindberg       | University of Minnesota                   | Minneapolis, MN |
| Darlette G Luke      | M Health Fairview                         | Minneapolis, MN |
| Rosario Machicado    | Olive View - UCLA                         | Sylmar, CA      |
| Zeinab Mohamud       | University of Minnesota                   | Minneapolis, MN |

|                          |                         |                 |
|--------------------------|-------------------------|-----------------|
| Thomas A Murray          | University of Minnesota | Minneapolis, MN |
| Rumbidzai Ngonyama       | University of Minnesota | Minneapolis, MN |
| Jacinda M Nicklas        | University of Colorado  | Aurora, CO      |
| David J Odde             | University of Minnesota | Minneapolis, MN |
| Elliott Parrens          | M Health Fairview       | Minneapolis, MN |
| Daniela Parra            | University of Minnesota | Minneapolis, MN |
| Barkha Patel             | University of Minnesota | Minneapolis, MN |
| Jennifer L Proper        | University of Minnesota | Minneapolis, MN |
| Matthew F Pullen         | University of Minnesota | Minneapolis, MN |
| Michael A Puskarich      | Hennepin Healthcare     | Minneapolis, MN |
| Via Rao                  | University of Minnesota | Minneapolis, MN |
| Neha V Reddy             | University of Minnesota | Minneapolis, MN |
| Naveen Reddy             | Northwestern University | Chicago, IL     |
| Katelyn J Rypka          | University of Minnesota | Minneapolis, MN |
| Hanna G Saveraid         | University of Minnesota | Minneapolis, MN |
| Paula Seloadji           | Olive View - UCLA       | Sylmar, CA      |
| Arman Shahriar           | University of Minnesota | Minneapolis, MN |
| Nancy Sherwood           | University of Minnesota | Minneapolis, MN |
| Jamie L Siegart          | University of Colorado  | Aurora, CO      |
| Lianne K Siegel          | University of Minnesota | Minneapolis, MN |
| Lucas Simmons            | University of Minnesota | Minneapolis, MN |
| Isabella Sinelli         | University of Colorado  | Aurora, CO      |
| Palak Singh              | University of Minnesota | Minneapolis, MN |
| Andrew Snyder            | M Health Fairview       | Minneapolis, MN |
| Maxwell T Stauffer       | St. Olaf College        | Northfield, MN  |
| Jennifer Thompson        | Vanderbilt University   | Nashville, TN   |
| Christopher J Tignanelli | University of Minnesota | Minneapolis, MN |
| Tannon L Tople           | University of Minnesota | Minneapolis, MN |
| Walker J Tordsen         | Hennepin Healthcare     | Minneapolis, MN |
| Ray HB Watson            | University of Minnesota | Minneapolis, MN |
| Beiqing Wu               | University of Minnesota | Minneapolis, MN |
| Adnin Zaman              | University of Colorado  | Aurora, CO      |
| Madeline R Zolik         | M Health Fairview       | Minneapolis, MN |
| Lena Zinkl               | M Health Fairview       | Minneapolis, MN |

---

## 2 Supplementary Methods

The Covid-Out trial was performed in accordance with the principles of the Declaration of Helsinki and Good Clinical Practice (GCP) standards as an FDA Investigational New Drug (IND) registered trial.

### 2.1 Full Inclusion and Exclusion Criteria

#### 2.1.1 Inclusion Criteria

- Positive laboratory test for active SARS-CoV-2 viral infection based on local laboratory standard (e.g. PCR, rapid antigen test) within 3 days of randomization. Result must be verifiable.
- No known previous history of confirmed SARS-CoV-2 infection
- Age  $\geq 30$  years and  $< 85$  years
- Body Mass Index (BMI)  $\geq 25$  kg/m<sup>2</sup> by self-report height/weight or  $\geq 23$  kg/m<sup>2</sup> in persons with Asian or Latinx background <sup>1-3</sup>
- Has an address and electronic device for communication
- Estimated Glomerular Filtration Rate (eGFR)  $>45$ ml/min/1.73m<sup>2</sup> within 2 weeks for patients  $>75$  years old, or with history of heart, kidney, or liver failure.\*

\*If eGFR not available in electronic health record within 2 weeks, eGFR was tested via self-collected capillary blood sample into a microtainer or mobile phlebotomy where available. Participants were allowed to start study drug while the sample was processed by the study lab as it was deemed low risk to take low-dose metformin for 1 to 5 days while this processing occurred. If eGFR resulted as less than 45ml/min/1.73m<sup>2</sup>, participants were instructed to discontinue study medicines and were considered as a screen failure.

#### 2.1.2 Exclusion Criteria

- Hospitalized, for COVID-19 or other reasons.
- Symptom onset greater than 7 days before randomization (symptoms not required for inclusion).
- Immunocompromised (e.g. solid organ transplant, bone marrow transplant, AIDS, on chronic high dose steroids).
- Hepatic impairment (Child-Pugh B and C)
- Inability to obtain informed consent
- Enrollment in another blinded COVID-19 randomized trial
- Already received an effective (FDA approved/EUA\*) therapy for COVID-19 BEFORE randomization (e.g. SARS-CoV-2 monoclonal antibody)
- Alcohol use disorder
- Other unstable medical condition or combination of home medications that in the view of the investigator make it unsafe for the individual to participate
- History of severe kidney disease:
  - Stage 4-5 chronic kidney disease or eGFR of  $<45$ ml/min/ 1.73 m<sup>2</sup>\*
  - Other kidney disease that in the opinion of the investigator would affect clearance of metformin
- Unstable heart failure (Stage 3 or 4 heart failure)
- Current use of or past allergy to metformin, fluvoxamine, or ivermectin
- Bipolar disease: individuals who report they have bipolar disorder or are taking medication for bipolar disorder (lithium, valproate, high-dose antipsychotic), unless the investigator concludes that the risk for mania is unlikely (i.e. it is doubtful that the patient actually has bipolar disorder).
- Current Loa Loa or onchocerciasis infection
- Typhoid, Bacillus Calmette–Guérin (BCG), or cholera vaccination within 14-days.

[Back to Top](#)

- Concomitant medication exclusion, as below.

Medication Exclusions:

- cimetidine, hydroxychloroquine, insulin, sulfonylurea, dolutegravir, patiromer, ranolazine, tafenoquine.
- rasagiline, selegiline, or monoamine oxidase inhibitors, linezolid, methadone
- duloxetine, methylene blue
- tizanidine, ramelteon, sodium picosulfate
- alosetron, agomelatine, bromopride, dapoxetine, tamsimelteon, thioridazine, urokinase, pimozone

The following medications may not need to be excluded when dose for that individual is considered alongside the low dose of fluvoxamine being used and other medications being used. The PI or site PI may review and decide if the patient should be excluded from the fluvoxamine arms as these are all *Risk C, monitor therapy*:

- Taking SSRIs, SNRIs, or tricyclic antidepressants, unless these are at a low dose such that a study investigator concludes that a clinically significant interaction with fluvoxamine (ie either serotonin syndrome or TCA overdose) is unlikely (examples: participant takes escitalopram but only at 10mg daily; that dose plus 100mg fluvoxamine would be insufficient to cause serotonin syndrome; or, participant takes amitriptyline but only at 25mg nightly; even if fluvoxamine inhibits its metabolism, it would be an insufficient dose to cause QTc prolongation or problematic side effects).
- Individuals who take alprazolam or diazepam and are unwilling to cut the medication by 20% (rationale: fluvoxamine modestly inhibits the metabolism of these drugs).
- Participants taking theophylline, clozapine, or olanzapine (drugs with a narrow therapeutic index that are primarily metabolized by CYP 1A2, which is inhibited by fluvoxamine) will be reviewed with a study investigator and excluded unless the investigator concludes that the risk to the participant is low (this would be unlikely; example: participant takes clozapine only as needed and is willing to avoid it for the 14 days of the study).
- Patients will be advised that there is a small risk that the following substances will be affected by fluvoxamine, but that significant effects are not likely at the low dose being used of: caffeine, nicotine, melatonin.
- Taking warfarin-also known as Coumadin, NSAIDs, and Aspirin (rationale: increased risk of bleeding), phenytoin (rationale: fluvoxamine inhibits its metabolism), clopidogrel (rationale: fluvoxamine inhibits its metabolism from pro-drug to active drug which raises risk of cardiovascular events), and St John's wort (rationale: fluvoxamine + St John's wort are considered contraindicated because of the risk of serotonin syndrome).

## 2.2 Reasons for Trial Exclusion

- Total Persons excluded ( $n = 5,178$ )
- BMI  $<25 \text{ kg/m}^2$ , or  $<23 \text{ kg/m}^2$  for those who identify as Asian or Latinx background ( $n = 769$ )
- Medication exclusion ( $n = 594$ )
- Symptoms started  $>7$  days ago ( $n = 593$ )
- More than 3 days since positive SARS-CoV-2 test ( $n = 589$ )
- Currently admitted to hospital ( $n = 427$ )
- Previously tested positive for SARS-CoV-2 in prior illness ( $n = 413$ )
- Spoken language not available in translated materials ( $n = 199$ )
- Immunocompromised ( $n = 145$ )
- Chronic Kidney Disease with eGFR  $<45 \text{ mL/min/1.73m}^2$  within last 2 months ( $n = 90$ )

[Back to Top](#)

- Incarcerated ( $n = 77$ )
- Alcohol use disorder ( $n = 32$ )
- Already enrolled in another clinical trial for Covid-19 treatment ( $n = 16$ )
- At an inpatient rehab center ( $n = 14$ )
- Stage 4 heart failure within last 2 months ( $n = 8$ )
- Previous allergic reaction to one of the study drugs ( $n = 3$ )
- Other ( $n = 1209$ , the most common reason was no interest in participating in the research study)

## 2.3 Randomization Details

- The statistician pre-generated allocation sequences for each study site using the mass weighted urn design,<sup>4</sup> which restricts deviations from the targeted equal allocation similar to randomly permuted blocks but with fewer deterministic assignments on average. Schedules for the 1:1 metformin versus placebo allocation used a total urn mass of  $\alpha = 3$ , which is similar to randomly permuted blocks of size 6. Schedules for the 6 arms used a total urn mass of  $\alpha = 6$ , which is similar to randomly permuted blocks of size 12. After the two fluvoxamine arms were stopped early for futility, the unused assignments for the fluvoxamine arms were skipped over (or deleted) from the pre-generated 6 arm allocation schedules.
- Assignments were drawn sequentially from the pre-generated schedules using a password protected Shiny application that required research coordinators to provide participant weight (because of ivermectin's weight-based dosing) and study site. The application would provide the research coordinator with a packet ID containing study drug at the appropriate weight-based dosage corresponding to the assigned arm. Pharmacists with the University of Minnesota Investigational Drug Service worked with the study statistician to create study packets with these unique identifiers. The assigned packet was then distributed to the study subject.
- Metformin randomization began December 30, 2020. Ivermectin and fluvoxamine arms opened on May 21, 2021, and thereafter every participant received two blinded study medicines, pre-packed by pharmacists into a pillbox to assure they took the correct number of each study medicine. Refer to **Supplemental Figure S9** for images of the pillboxes.
- For the analysis, the metformin group consists of participants who received metformin alone or metformin in combination with either fluvoxamine or ivermectin. The metformin control group consists of participants who received placebo, fluvoxamine alone, or ivermectin alone. The fluvoxamine group consists of participants who received fluvoxamine alone or fluvoxamine in combination with metformin. The fluvoxamine control group consists of participants who enrolled when fluvoxamine was available but who were randomized to either placebo or metformin alone. The ivermectin and ivermectin control groups were constructed similarly (**Figure 1**). Only concurrently randomized controls were used.
- As pictured in **Figure 1**, the concurrent control group for each study drug consists of participants who were eligible to be randomized to a condition with the active version of the study drug, but who were randomized to a control condition instead. Specifically, the metformin active group includes persons randomized to metformin alone, metformin + ivermectin, or metformin + fluvoxamine, whereas the metformin control arm includes persons randomized to metformin matched placebo, ivermectin alone, or fluvoxamine alone.
- The control group for ivermectin includes persons randomized to placebo or metformin alone, but who were eligible to be randomized to a regimen with ivermectin, and similarly for fluvoxamine. In particular, the control arms for ivermectin and fluvoxamine do not include any persons randomized to placebo

[Back to Top](#)



during the initial study period where metformin was the only active drug available. The primary statistical analysis estimates the main effect of each study drug controlling for baseline vaccination status and the other study drug(s).

## 2.4 Sample Size Considerations

The a priori assumptions in designing the trial included were:

- A hypothesized rate of the primary composite endpoint would be 20% in the placebo arm and 11% in each monotherapy arm, which corresponds to a relative risk reduction of 45%.
- Assuming additive effects on the log-odds scale, the hypothesized rate of the primary composite endpoint in the combination therapy arms is 6%.
- Under equal allocation to the 6 arms, this leads to hypothesized rates of 14% =  $(0.2 + 0.11 + 0.11)/3$  versus 7.7% =  $(0.11 + 0.06 + 0.06)/3$  in the metformin control and active arms, respectively, which corresponds to a relative risk reduction of 45%.
- To detect this effect with 90% power using a marginal test two-sample binomial proportion test with 5% two-sided type I error requires 1,008 total participants contributing data, equating to 169 participants per arm.
- The fluvoxamine and ivermectin comparisons have lower power as these arms include participants assigned to 4 of the 6 arms.
- The a priori assumption was of 10% withdrawal and/or lost to follow up not contributing outcome data
- To account for the interim analysis plan and losses to follow-up, the original plan was for enrollment of 1,124 total participants (account for up to 10% withdrawal).

### *Sample Size Re-estimation*

At time of the second interim analysis, a planned sample size re-estimation occurred which incorporated the current (lower than expected) lost to follow up rate, the projected proportion of participants vaccinated (which was increasing over time), the actual event rate in the placebo arm by vaccination status, as well as external data on possible effect sizes of fluvoxamine motivating detection of a relative risk reduction of 35% with at least 80% power.

On 24 November 2021, motivated by lack of certainty in the placebo control event rate and external data indicating that fluvoxamine may provide a ~33% relative risk reduction,<sup>5</sup> the unblinded statistician carried out a pre-specified sample size re-estimation procedure based on interim outcome data to revise the target enrollment to 1,350 participants. This revised target would provide 90% power for the main effect of metformin, and 80% power for the main effects of fluvoxamine and ivermectin, assuming multiplicative 35% relative risk reductions of each study drug and a projected estimate of the event rate in the placebo arm that accounted for the vaccination rates of recent enrollees.

On 7 January 2022, the DSMB conducted a third interim analysis of futility and efficacy, after enrollment of approximately 1,100 participants. At that time, the DSMB recommended stopping fluvoxamine for futility with a conditional power of less than 3%. The final sample size was reduced by the number of participants who would have been allocated to fluvoxamine in remaining study period for a total enrollment goal of 1,290 participants.

[Back to Top](#)

## 2.5 Outcome Assessments

### Pulse Oximetry

Pulse oximetry was assessed using a home finger pulse oximeter, “Zacurate, 500DL Pro Series” Distributed by Einstein Associates LLC; 10101 Stafford Centre Dr, Ste B, Stafford TX 77477. Designed in the USA, Made in China. This pulse oximeter provides oxygen saturation and heart rate. The manufacturer’s stated accuracy of is within  $\pm 2\%$  for oximetry readings between 70% to 99%.

The threshold of  $\leq 93\%$  for hypoxemia was defined as per FDA definition for severe Covid-19.<sup>6</sup>

Participants were instructed to take daily pulse oximetry measurements and record these on a daily symptom diary. Additionally, participants were instructed that if they had a pulse oximetry level below 94%, they should sit-up straight, make sure their hands are warm, and retake their pulse oximetry. Many participants recorded multiple readings per day. Research staff were not in communication with participants on each day of their involvement (unless the participant desired/needed daily communication), so oxygen readings were reviewed after the daily symptom diaries were returned by US postal mail. This delayed review of pulse oximetry data prevented clarity on values written down in the daily diary that did not appear to be pulse oxygen measurements.

**Sources of bias for the oxygen readings are outlined below. Hypoxemia likely added noise as a component of the 4-party binary composite primary outcome.<sup>8</sup>**

- 1) **Measurement error:** While instructions were given to minimize measurement error, values may have been falsely low due to measurement techniques (i.e. having cold hands; or having the oximeter on a finger with the thickest skin).
  - a. Also, the devices may not fit all individuals’ fingers the same, causing measurement error.
- 2) **Inherent error in the device:** On February 21, 2021, the FDA issued a safety communication with concerns expressed over the accuracy of home pulse oximeters.<sup>7</sup> We did not use prescription oximeters, but rather over-the-counter oximeters due to cost limitations. For prescription oximeters, 66% of readings will fall within 2-3% of arterial blood gas. Additionally, analyses have found that color of skin can affect the accuracy of pulse oximetry.<sup>9</sup>
- 3) **Misclassification bias:** The protocol did not specify movement before measurements, nor time between measurements, as we did not want to overwhelm participants. The values were collected on paper logs, which created a lag time to analysis of the written values.
  - a. Some low values may represent transient lower oxygen saturation that does not represent true hypoxemia (i.e. atelectasis because they had not coughed, stood up, or walked in some time).
- 4) **Selection bias:** Instructions to participants did not specify a certain number of times that each person had to measure their oxygen each day, nor that participants should always record their highest value.
  - a. Some individuals may have entered their lowest number.
  - b. Some entered many readings per day, while others entered only one.

### Emergency Department Visits, Hospitalizations, and Death

Primary outcome events that occurred between enrollment and taking the first dose of study drug were not included as outcomes in the modified intent-to-treat analysis. These outcomes are included in the intent-to-treat analysis.

Participants provided informed consent to review medical records in order to verify the occurrence of emergency room visits, hospitalizations, and death as needed. Emergency department visits and hospitalizations were adjudicated as Covid-19 related or not, and all investigators remain blinded to randomized study arm for individual participants. Only one hospitalization was adjudicated as non-Covid-related of a bacterial abscess on the leg.

[Back to Top](#)

## 2.6 Handling of Missing Data

Overall, 18 participants (1.36%) were missing one or more components of the day 14 composite outcome and were unresponsive to attempts at follow up. Overall, 10 had unknown vital status of whom none had an online obituary that we could find, or deactivated email account as of 12 May 2022. The a priori approach as specified in the Statistical Analysis Plan was to multiply impute missing data.

| Descriptive statistics regarding the incomplete aspects of the primary endpoint. |                   |                  |                  |                  |                  |                 |                 |
|----------------------------------------------------------------------------------|-------------------|------------------|------------------|------------------|------------------|-----------------|-----------------|
|                                                                                  | Overall           | Metformin        |                  | Ivermectin       |                  | Fluvoxamine     |                 |
|                                                                                  |                   | Active           | Control          | Active           | Control          | Active          | Control         |
| <b>Missing Participant - Reported Component</b>                                  | 18/1323<br>(1%)   | 11/663<br>(2%)   | 7/660<br>(1%)    | 3/410<br>(1%)    | 7/398<br>(2%)    | 5/334<br>(1%)   | 6/327<br>(2%)   |
| <b>Hypoxemia or Supplemental O<sub>2</sub></b>                                   | 18/1323<br>(1%)   | 11/663<br>(2%)   | 7/660<br>(1%)    | 3/410<br>(1%)    | 7/398<br>(2%)    | 5/334<br>(1%)   | 6/327<br>(2%)   |
| <b>Emergency Dept Visit</b>                                                      | 15/1323<br>(1%)   | 10/663<br>(2%)   | 5/660<br>(1%)    | 3/410<br>(1%)    | 4/398<br>(1%)    | 5/334<br>(1%)   | 3/327<br>(1%)   |
| <b>Hospitalization</b>                                                           | 14/1323<br>(1%)   | 9/663<br>(1%)    | 5/660<br>(1%)    | 3/410<br>(1%)    | 4/398<br>(1%)    | 5/334<br>(1%)   | 3/327<br>(1%)   |
| <b>Death</b>                                                                     | 10/1323<br>(1%)   | 5/663<br>(1%)    | 5/660<br>(1%)    | 2/410<br>(0%)    | 2/398<br>(1%)    | 0/334<br>(0%)   | 0/327<br>(0%)   |
| <b>Incomplete or missing SpO<sub>2</sub> Daily Log Data (&lt;14 Days)</b>        | 371/1323<br>(28%) | 199/663<br>(30%) | 172/660<br>(26%) | 100/410<br>(24%) | 111/398<br>(28%) | 99/334<br>(30%) | 89/327<br>(27%) |
| <b>0 Days with Data</b>                                                          | 250/1323<br>(19%) | 134/663<br>(20%) | 116/660<br>(18%) | 69/410<br>(17%)  | 77/398<br>(19%)  | 68/334<br>(20%) | 63/327<br>(19%) |
| <b>1 - 7 Days with Data</b>                                                      | 29/1323<br>(2%)   | 14/663<br>(2%)   | 15/660<br>(2%)   | 5/410<br>(1%)    | 13/398<br>(3%)   | 6/334<br>(2%)   | 7/327<br>(2%)   |
| <b>8 - 13 Days with Data</b>                                                     | 92/1323<br>(7%)   | 51/663<br>(8%)   | 41/660<br>(6%)   | 26/410<br>(6%)   | 21/398<br>(5%)   | 25/334<br>(7%)  | 19/327<br>(6%)  |

Our primary approach to handling missing primary outcome data on Day 14 was to conduct our analysis using multiple imputation. Specifically, we used predictive mean matching to multiply impute missing outcomes and vaccination status. Missing covariate information were jointly imputed along with missing outcomes using multiple imputation with chained equations and predictive mean matching for the univariate imputation models; along with outcome and vaccination status information, imputation models were informed by sex, BMI, symptom duration, race, baseline comorbidities, and maximum daily SpO<sub>2</sub> from the logs, per the guidelines of Sterne, et al (2009) as well as self-reported outcomes.<sup>10</sup>

Further guidance on choice of imputation model is described in the Statistical Analysis Plan. Imputation regression models were developed based on all available data, i.e. patients who have completed the requisite follow-up time of 14 days for the primary outcome. Imputation was carried out using the mice R package version 3.14.0.<sup>11</sup> Imputation was carried out using 50 imputed datasets, each with at least 40 iterations of the mice algorithm.<sup>11</sup> We assessed convergence diagnostics to verify convergence of the imputations per Section 6.5 of Van Buuren et al.<sup>12</sup> The primary analysis utilized a multiply-imputed likelihood ratio test that tests the effect of the treatment by comparing nested logistic regression models.<sup>13</sup> Odds ratios and confidence intervals are constructed by combining results across imputed datasets via Rubin's rules.<sup>14</sup>

Additionally, as a sensitivity analysis, we performed a complete case analysis without any imputation, thereby excluding participants missing day 14 outcome data or SARS-CoV-2 vaccination status. Vaccination status was adjusted for in the regression model as in the primary analysis. Results are not

[Back to Top](#)

appreciably changed. This complete case analysis is presented in **Table S4**. The same approach was used for the intent-to-treat analyses.

## 2.7 Study Medication Dosing (and for exact-matching placebo)

### 2.7.1 Metformin

Metformin immediate release was given via a dose titration with:

- Day 1: 500mg once
- Day 2-5: 500mg twice daily
- Day 6-14: 500mg in the morning and 1,000mg in the evening

A maximum dose of 1,500mg was used because the risk of side effects is greatest at doses of 2,000mg per day,<sup>15</sup> which is the goal dose for diabetes treatment but titration to this dose is typically done over several weeks.

### 2.7.2 Ivermectin Dosing

Ivermectin and matched placebo were kindly provided as 7 and 14mg tablets by Edenbridge Pharmaceuticals (Parsippany-Troy Hills, New Jersey, USA). Ivermectin or matching placebo was given for 3 days with weight-based dosing with an objective to achieve at least approximately 400 mcg/kg/day dosing. This dose was chosen as it was higher than what was done in other trials at the time, but still well within the range of safe doses. As per the U.S. FDA Investigational New Drug (IND) procedures, FDA had to approve the dosing as safe. The weight-based dosing was:

|                  |                                  |
|------------------|----------------------------------|
| Less than 74kg   | 28 mg once daily (2 x 14mg)      |
| 74 to < 88kg     | 35mg once daily (2 x 14mg + 7mg) |
| 88 to < 106kg    | 42mg once daily (3 x 14)         |
| 106 to < 124kg   | 49mg once daily (3 x 14mg + 7mg) |
| 124kg to < 160kg | 56mg once daily (4 x 14mg)       |
| ≥ 160 kg         | 63mg once daily (4 x 14mg + 7mg) |

Overall, 90% (369 of 411) of participants received doses between 390 to 470 mcg/kg/day with 17 (4.1%) participants having received less than 390 mcg/kg/day, and 25 (6.1%) having received greater than 470 mcg/kg/day. The median dose received was 430 mcg/kg/day.

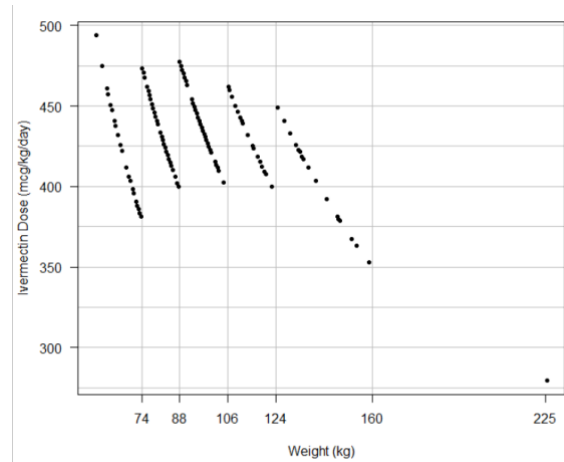

**Figure 2.7.2** Distribution of weight-based dosing.

### 2.7.3 Fluvoxamine Dosing

Fluvoxamine was given 1 dose on Day 1, then 50mg twice daily for days 2-14.

Fluvoxamine and identically matched placebo were kindly provided by Apotex Pharmaceuticals (Toronto, Ontario, Canada).

Refer to **Supplement Figure S9** for pictures of the study medicine and exact-matching placebo.

### 3 Supplementary Figures

#### 3.1 Figure S1A. Effect of metformin vs. control for the primary outcome, overall and by subgroups.

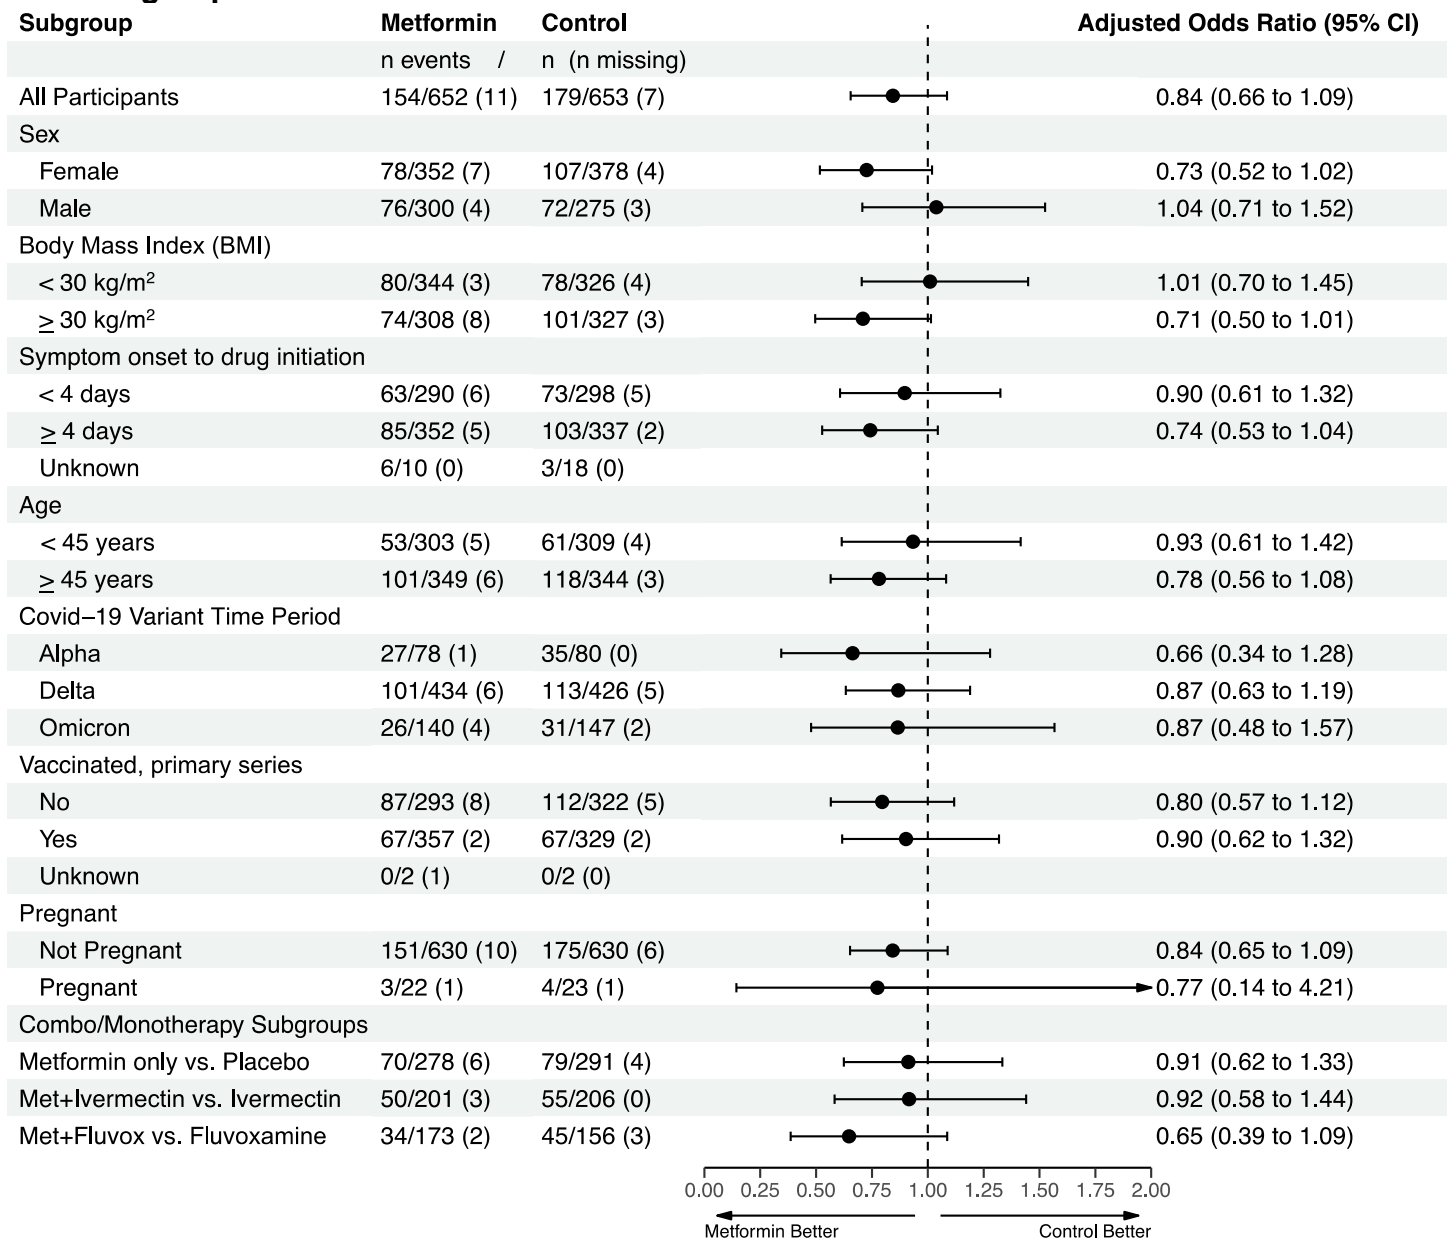

This forest plot shows a priori subgroups analyses of the primary composite endpoint showing odds ratios with 95% confidence intervals, adjusted for vaccination status. The 95% confidence intervals are not adjusted for multiplicity. If vaccination status was unknown, the value was multiply-imputed when used as a controlling variable. Hypoxemia is defined as oxygen saturation  $\leq 93\%$  or supplemental oxygen to maintain an oxygen saturation  $\geq 94\%$  on day 2 or later. Participants who only have an oxygen saturation  $\leq 93\%$  on Day 1 and not after are not counted as having achieved this endpoint. The number in parentheses for each subgroup stratum is the number of persons within that stratum that had any component of the primary outcome missing (Hypoxemia, emergency department visits, hospitalization, or death). A body mass index (BMI) cut-off of 30 kg/m<sup>2</sup> was used to compare those with overweight versus obesity. Variant periods were defined by epidemiologic data, Alpha: before June 19, 2021; Delta: June 19-December 12, 2021; Omicron: after December 12, 2021 through end of enrollment on January 28, 2022. The top row is all participants, subsequent rows are sub-groups. Abbreviations: Met = metformin, Fluvox = fluvoxamine.

[Back to Top](#)

### 3.2 Figure S1B. Effect of ivermectin vs. control for the primary outcome, overall and by subgroups.

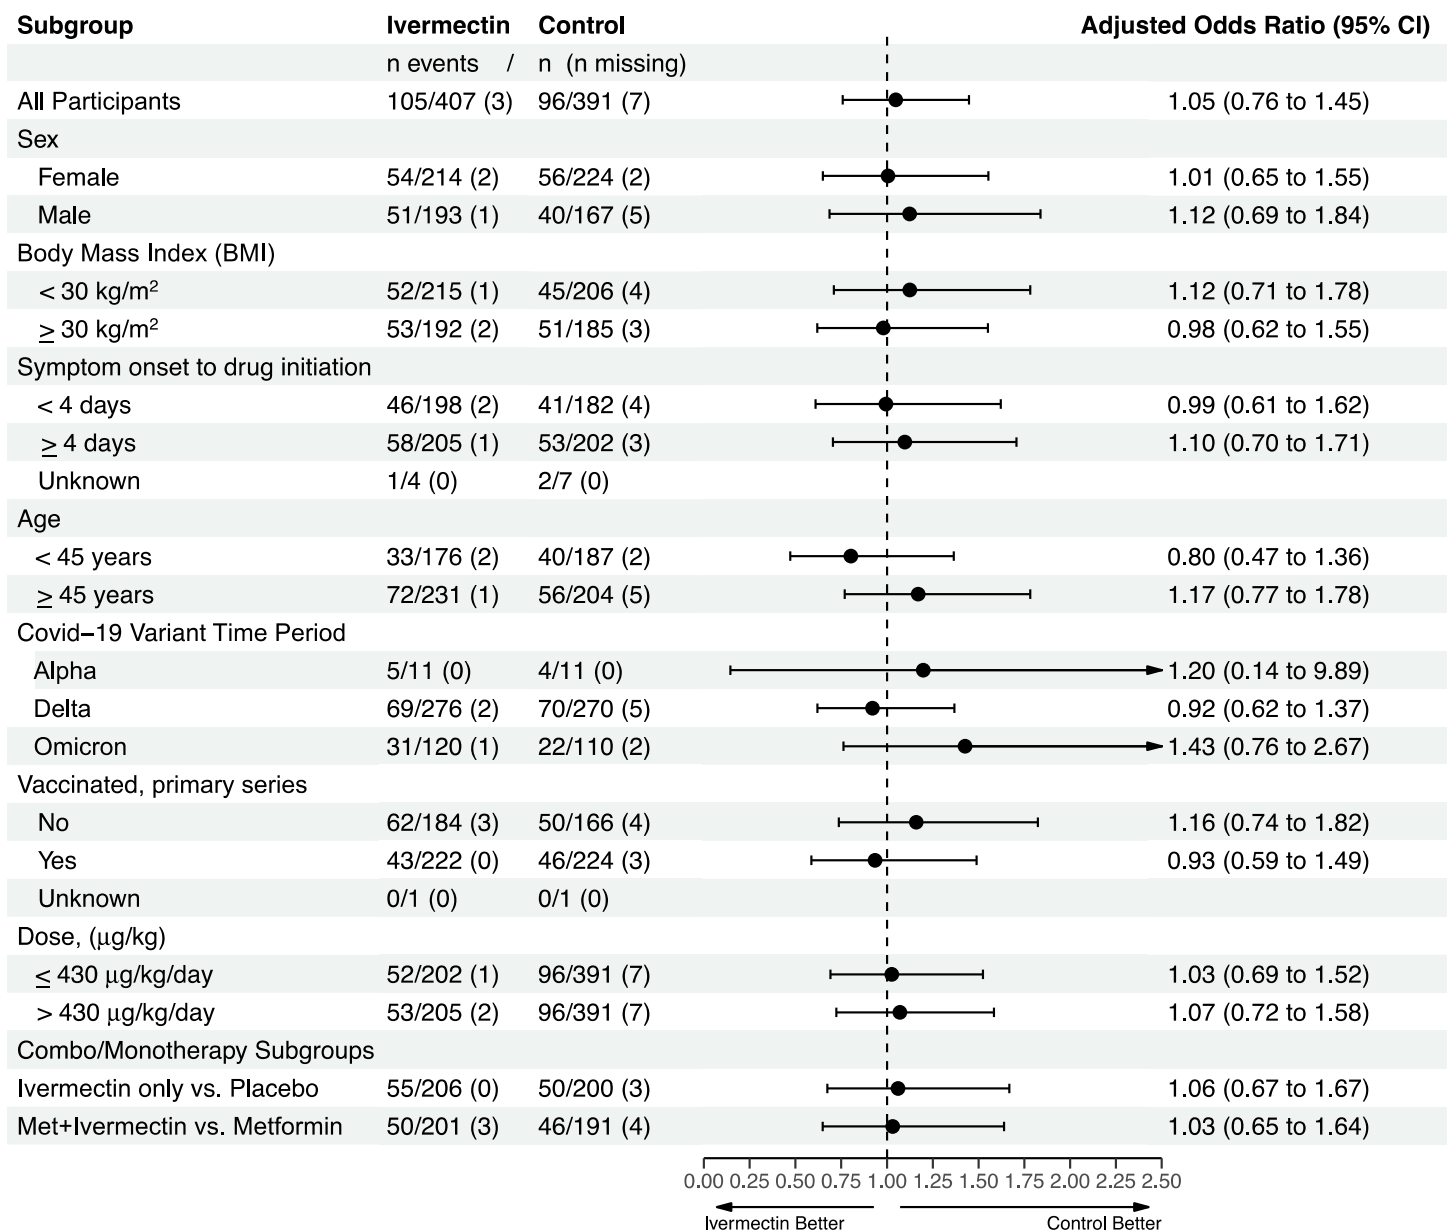

This forest plot shows a priori subgroups analyses of the primary composite endpoint showing odds ratios with 95% confidence intervals, adjusted for vaccination status and not adjusted for multiplicity. If vaccination status was unknown, the value was multiply-imputed when used as a controlling variable. Hypoxemia is defined as oxygen saturation  $\leq 93\%$  or supplemental oxygen to maintain an oxygen saturation  $\geq 94\%$  on day 2 or later. Participants who only have an oxygen saturation  $< 93\%$  on Day 1 and not after are not counted as having achieved this endpoint. The number in parentheses for each subgroup stratum is the number of persons within that stratum that had any component of the primary outcome missing (hypoxemia, emergency department visits, hospitalization, or death). A body mass index (BMI) cut-off of 30 kg/m<sup>2</sup> was used to compare those with overweight versus obesity. The top row is all participants, subsequent rows are sub-groups. Abbreviations: Met = metformin.

[Back to Top](#)



### 3.3 Figure S1C. Effect of fluvoxamine vs. control for the primary outcome, overall and by subgroups.

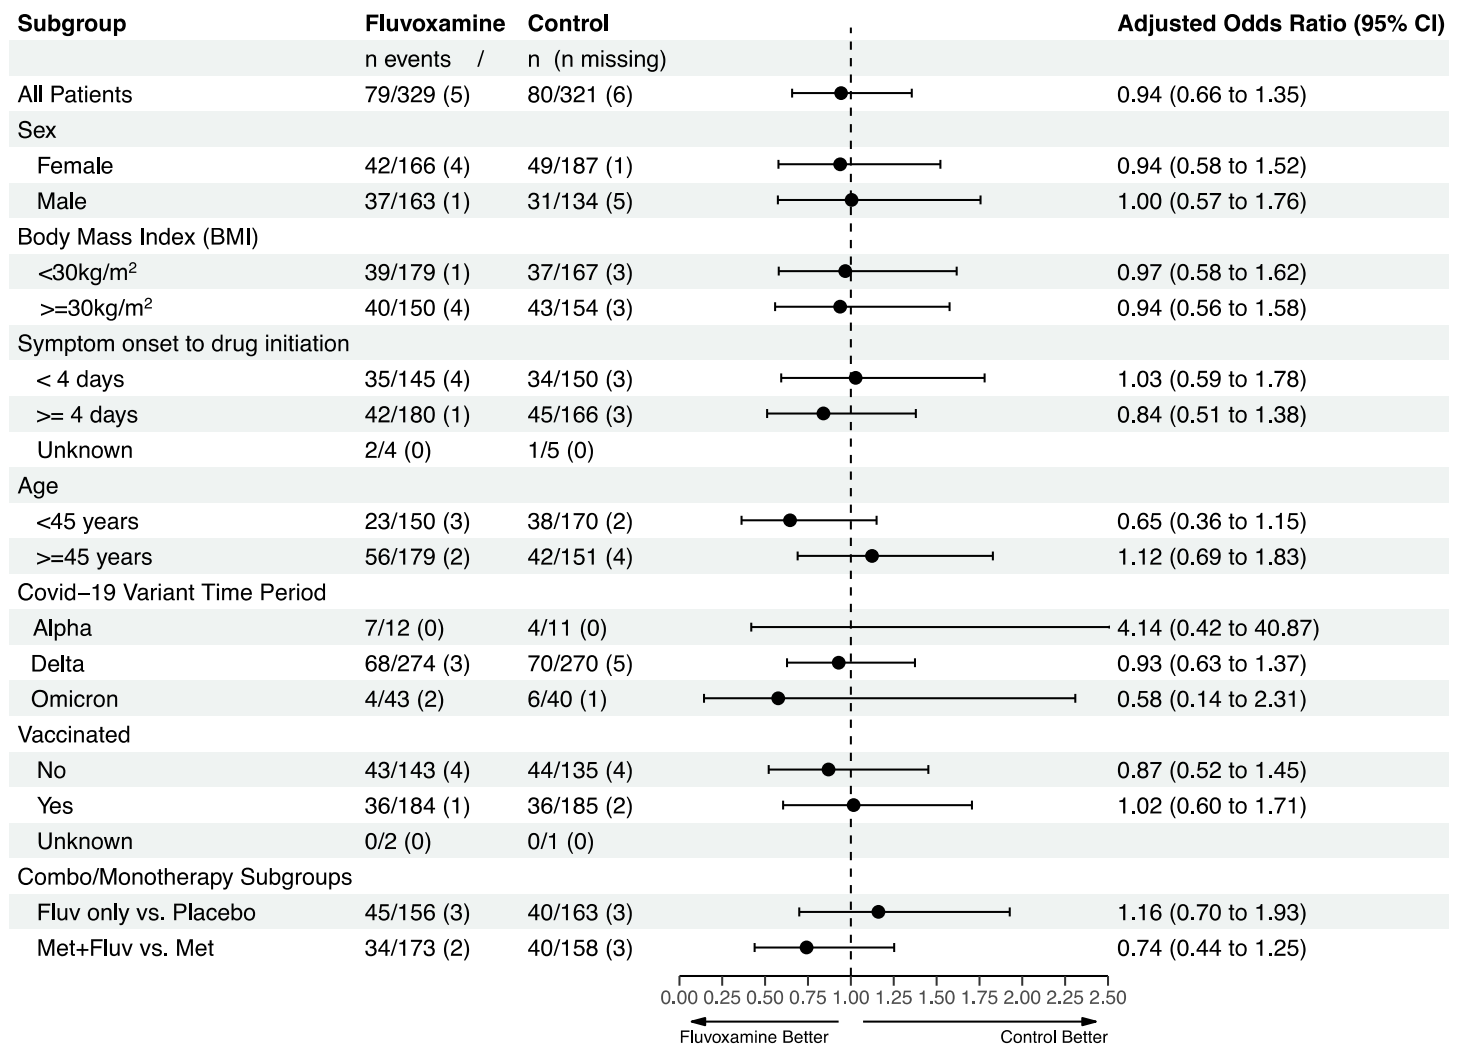

This forest plot shows for fluvoxamine the a priori subgroups analyses of the primary composite endpoint showing odds ratios with 95% confidence intervals, adjusted for vaccination status and not adjusted for multiplicity. If vaccination status was unknown, the value was multiply-imputed when used as a controlling variable. Hypoxemia is defined as oxygen saturation  $\leq 93\%$  or supplemental oxygen to maintain an oxygen saturation  $\geq 94\%$  on day 2 or later. Participants who only have an oxygen saturation  $\leq 93\%$  on Day 1 and not after are not counted as having achieved this endpoint. The number in parentheses for each subgroup stratum is the number of persons within that stratum that had any component of the primary outcome missing (hypoxemia, emergency department visits, hospitalization, or death). A body mass index (BMI) cut-off of 30 kg/m<sup>2</sup> was used to compare those with overweight versus obesity. The top row is all participants, subsequent rows are sub-groups. Abbreviations: Met = metformin.

Enrollment in the fluvoxamine arm was stopped on January 7, 2022 by the DSMB, thus this arm has a higher proportion of persons enrolled during the SARS-CoV-2 delta variant time period.

[Back to Top](#)

### 3.4 Figure S2A. Effect of metformin vs. control for healthcare utilization, overall and by subgroups.

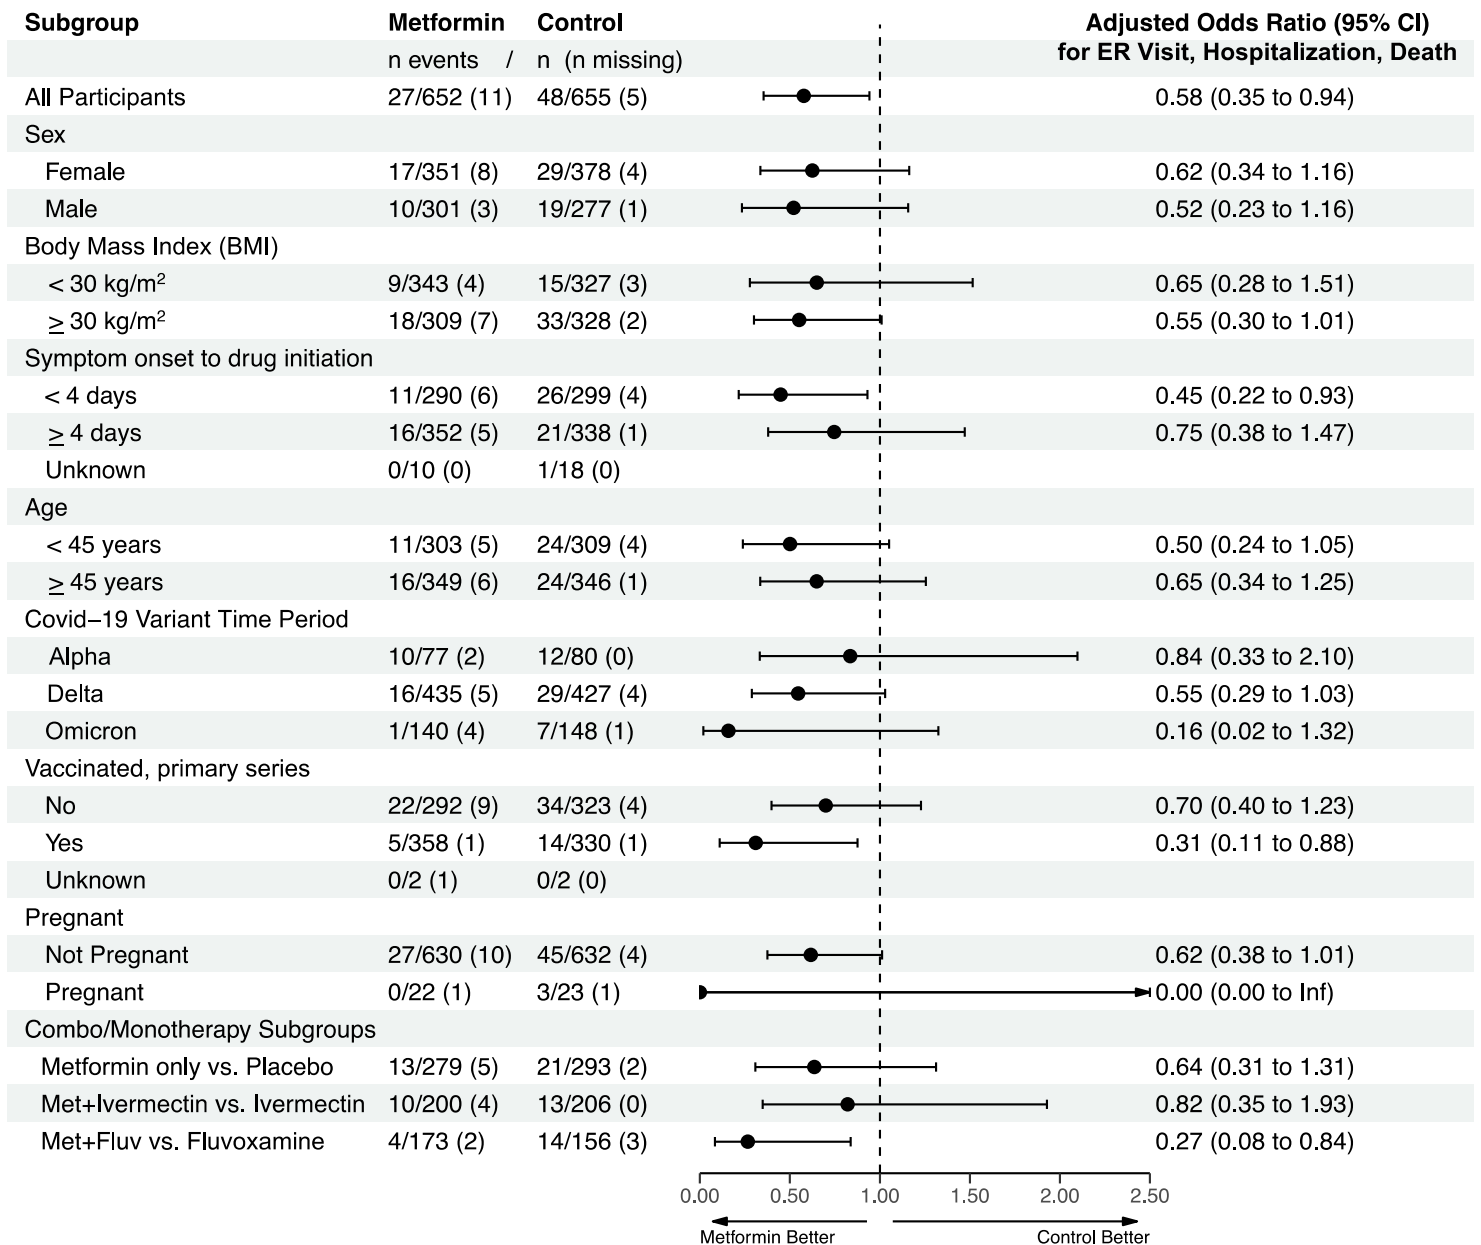

This forest plot presents the a priori subgroup analysis of the primary composite endpoint, with exclusion of the hypoxemia component – thereby presenting the odds of emergency department visit, hospitalization, or death due to Covid-19. The forest plot shows the adjusted odds ratios with 95% confidence intervals, which is adjusted for SARS-CoV-2 vaccination status and other medicines in the factorial trial design and not adjusted for multiplicity. If vaccination status was unknown, the value was multiply-imputed when used as a controlling variable. The number in parentheses for each subgroup stratum is the number of persons within that stratum that had any component of the primary outcome missing (emergency department visits, hospitalization, or death). A body mass index (BMI) cut-off of 30 kg/m<sup>2</sup> was used to compare those with overweight versus obesity. The top row is all participants, subsequent rows are sub-groups. Abbreviations: Met = metformin; Fluvox = fluvoxamine.

Previous research suggesting that metformin enhances T cell response may support a potential synergistic effect in those who had been vaccinated.<sup>16, 17</sup>

[Back to Top](#)



### 3.5 Figure S2B. Effect of ivermectin vs control for healthcare utilization, overall and by subgroups.

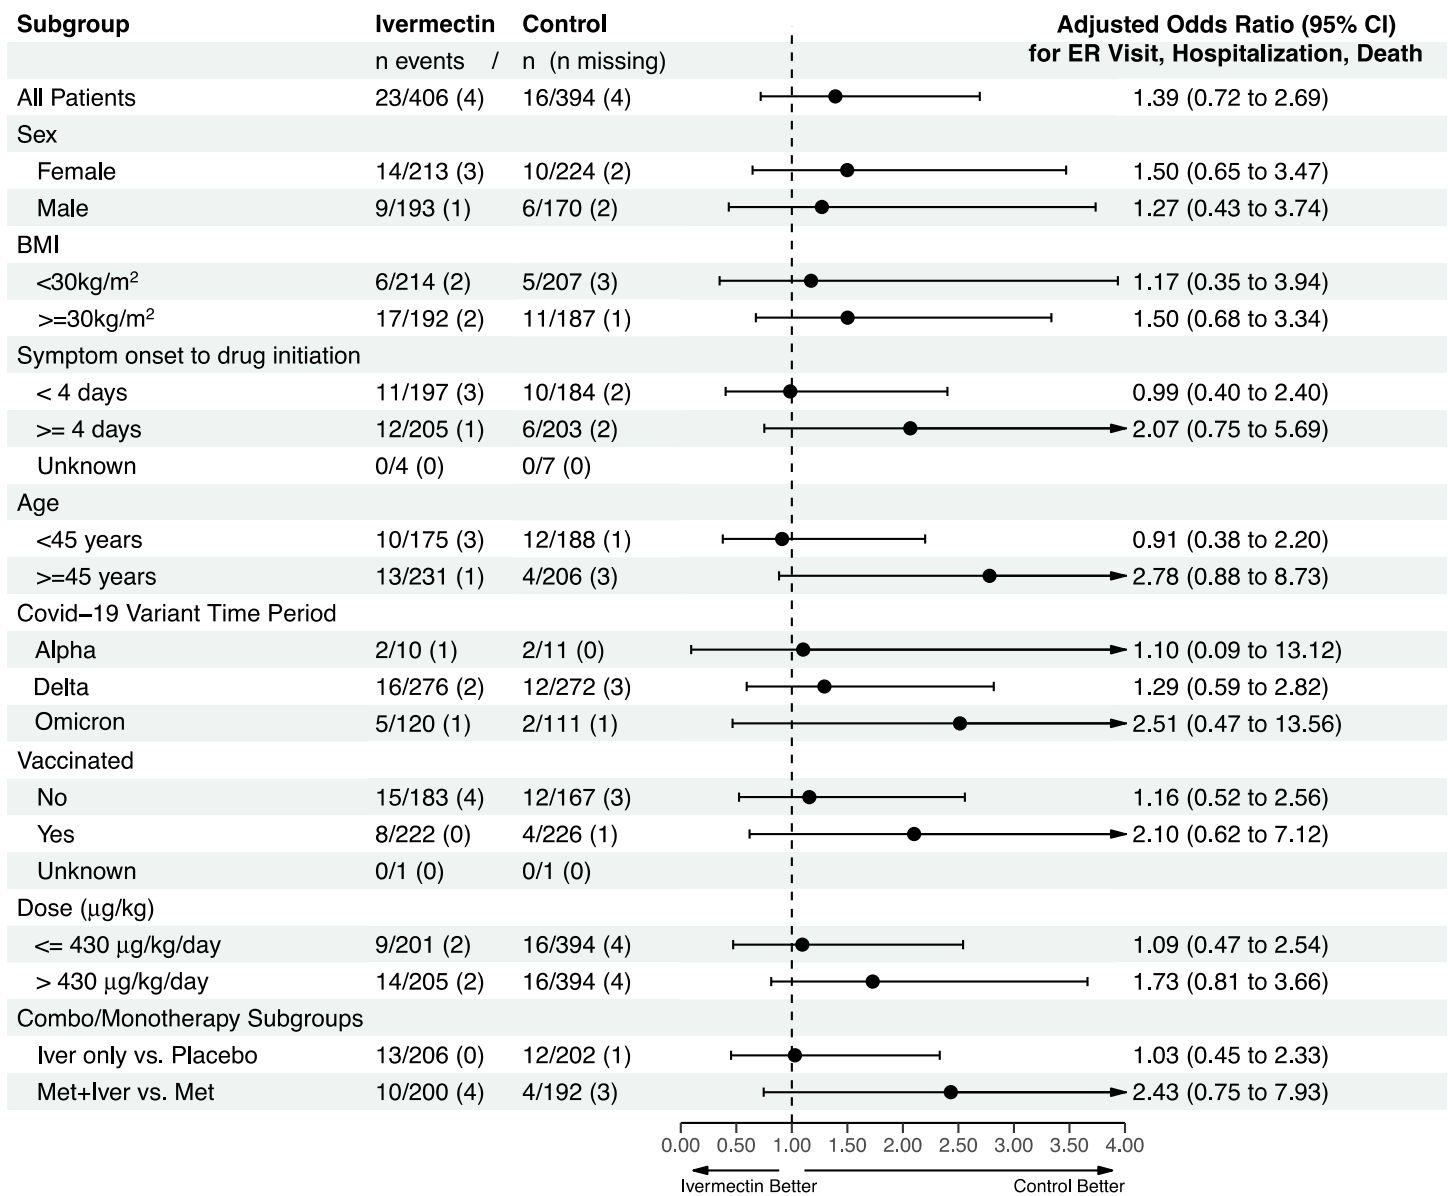

This forest plot presents the a priori subgroup analysis of the primary composite endpoint, with exclusion of the hypoxemia component – thereby presenting the odds of emergency department visit, hospitalization, or death. The forest plot shows the adjusted odds ratios with 95% confidence intervals, which is adjusted for vaccination status and other medicines in the factorial trial design and not adjusted for multiplicity. If vaccination status was unknown, the value was multiply-imputed when used as a controlling variable. The number in parentheses for each subgroup stratum is the number of persons within that stratum that had any component of the primary outcome missing (emergency department visits, hospitalization, or death). A Body mass index (BMI) cut-off of 30 kg/m<sup>2</sup> was used to compare those with overweight versus obesity. The top row is all participants, subsequent rows are sub-groups. Abbreviation: Met = metformin.

### 3.6 Figure S2C. Effect of fluvoxamine vs. control for healthcare utilization, overall and by subgroups.

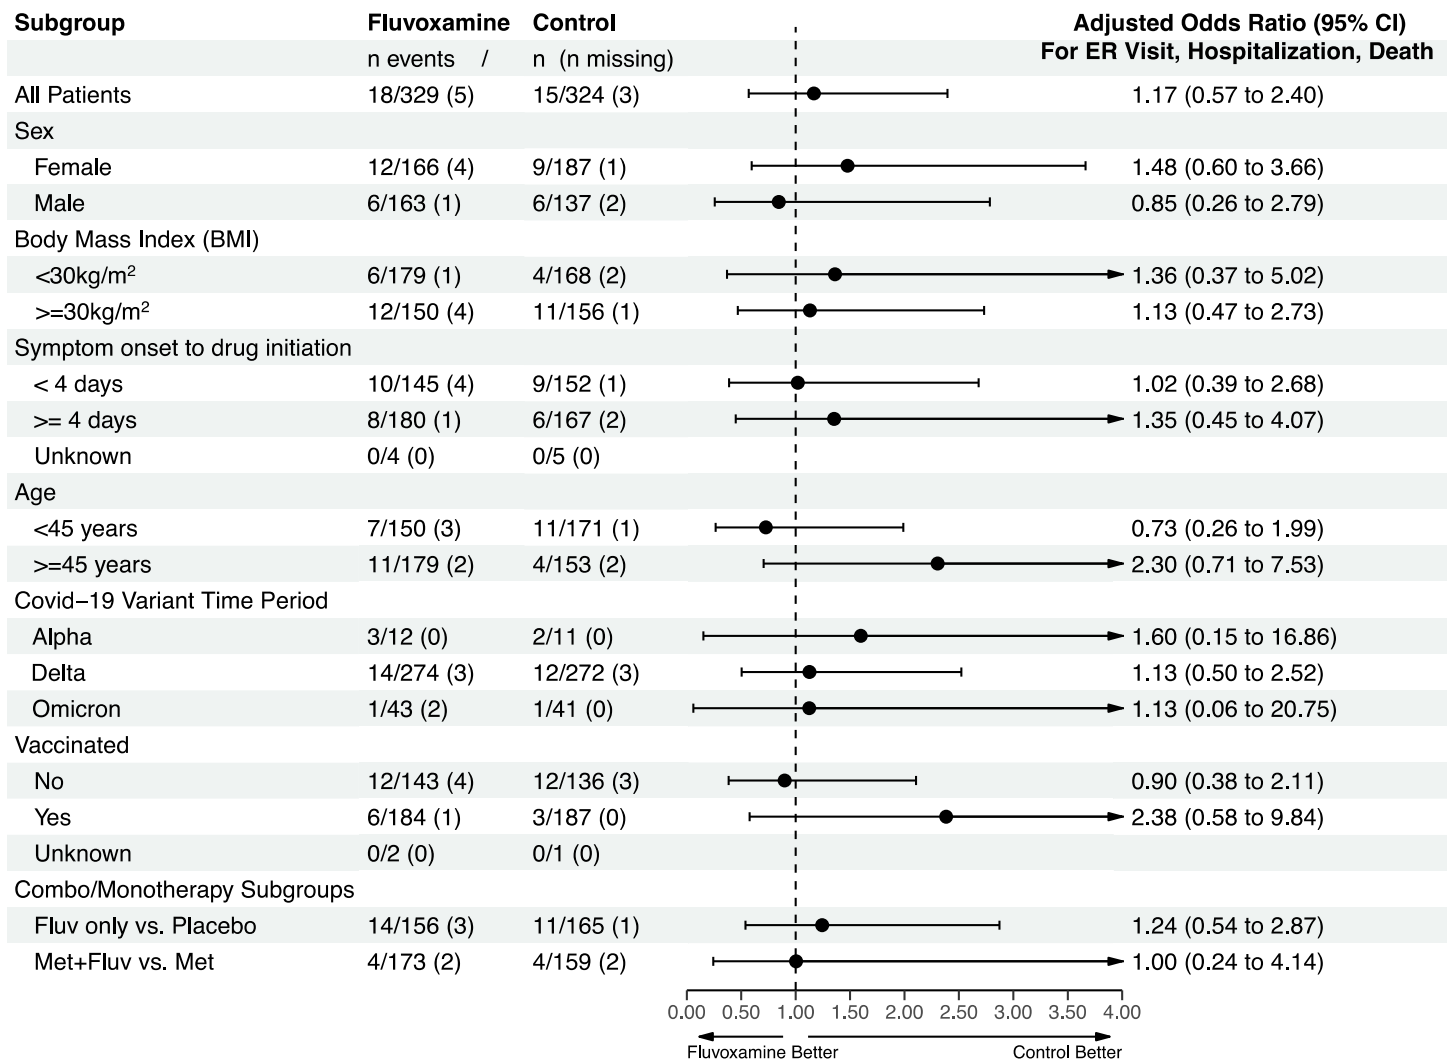

This forest plot presents the a priori subgroup analysis of the primary composite endpoint, with exclusion of the hypoxemia component – thereby presenting the odds of emergency department visit, hospitalization, or death. The forest plot shows the adjusted odds ratios with 95% confidence intervals, which is adjusted for vaccination status and other medicines in the factorial trial design and not adjusted for multiplicity. If vaccination status was unknown, the value was multiply-imputed when used as a controlling variable. The number in parentheses for each subgroup stratum is the number of persons within that stratum that had any component of the primary outcome missing (emergency department visits, hospitalization, or death). A Body mass index (BMI) cut-off of 30 kg/m<sup>2</sup> was used to compare those with overweight versus obesity. The top row is all participants, subsequent rows are sub-groups. Abbreviations: Met = metformin.

Enrollment in the fluvoxamine arm was stopped on January 7, 2022 by the DSMB, thus this arm has a higher proportion of persons enrolled during delta variant time period.

[Back to Top](#)

### 3.7 Figure S3. Venn Diagram of Components of Primary Composite Endpoint

Primary outcome components (within 14 days)

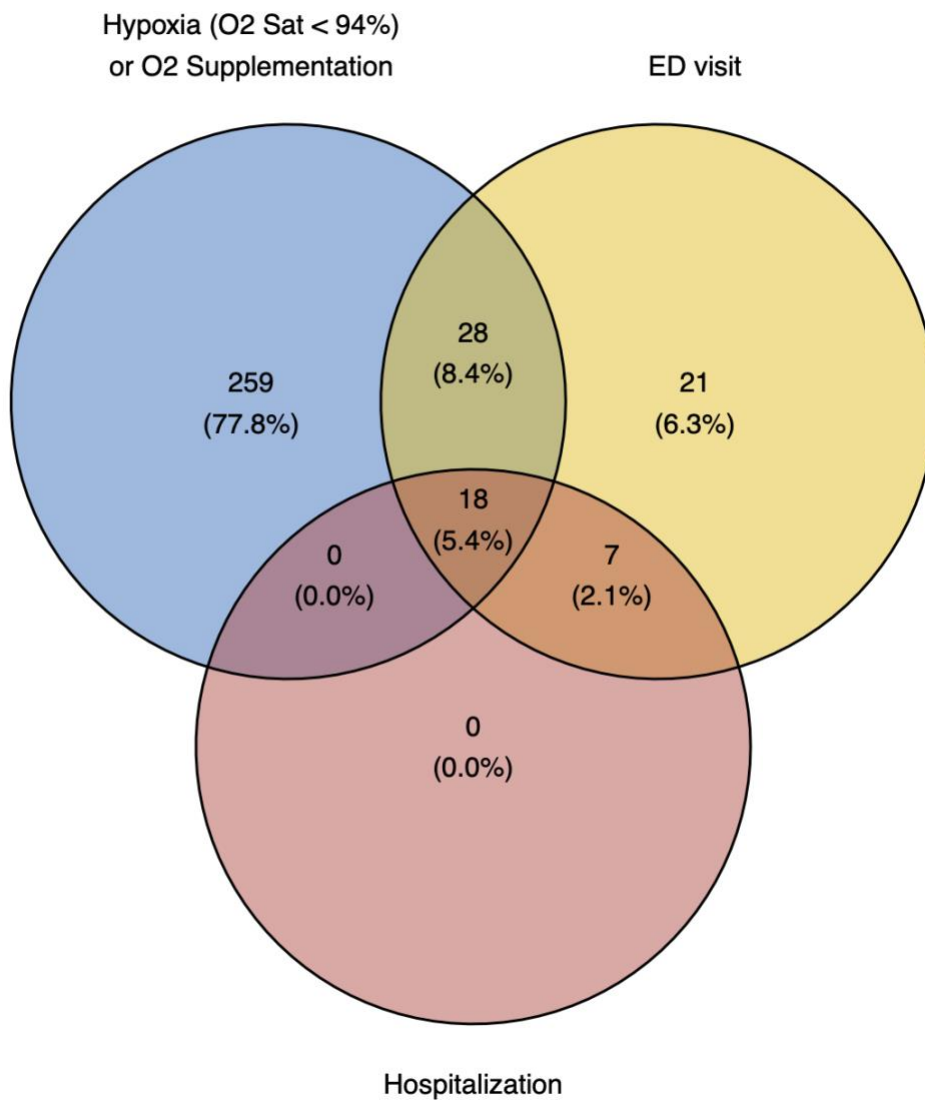

This is a Venn diagram of the components of the composite primary outcome: the blue circle is the hypoxemia; the yellow circle is emergency department visit; and the red circle is hospitalization. Of note, the one death did not have a preceding hospitalization or ED visit. As noted in the methods, participants recorded pulse oximetry readings on a daily symptom diary or reported via interview with research personnel, or both. The number with hypoxemia reflects those reporting any pulse oximetry reading  $\leq 93\%$  during the 14-day study period. The investigators later had concerns on the accuracy of self-reported oximetry readings after numerous participants recorded apparent spurious, transient readings which likely could reflect measurement error. Participants recorded a variable number of readings each day, thus causing a potential selection bias if averaging of readings were performed.

[Back to Top](#)

### 3.8 Figure S4. Covid-19 Specific Symptoms over Time by Study Medicine

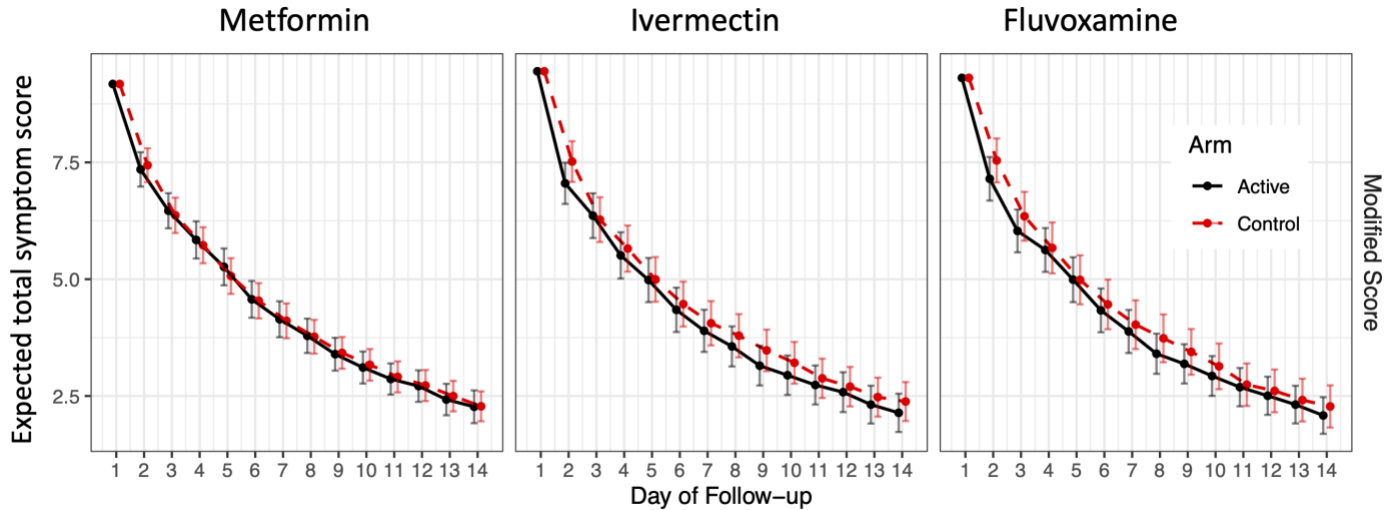

This line graph presents the composite Covid-specific symptom score, with active treatment group in black and the control group in red, compared using a generalized estimating equation adjusted for baseline score, vaccination status, and other study medications. The y-axis is the expected symptom severity score, and the x-axis is the number of days since randomization. The trajectories reflect the expected score over time conditional on the baseline mean score in the pooled analysis cohort, being unvaccinated, and not taking any other study medications.

Symptoms are graded as none (0), mild (1), moderate (2), or severe (3). Eight symptoms comprise the composite score based on COVID-19 symptoms are those present in the U.S. Council of State and Territorial Epidemiologists clinical case definition of: cough, shortness of breath, subjective fever, fatigue, myalgia, sore throat, chills, and headache as used in recent FDA emergency use authorizations. Lack of taste or lack of smell are not included in this composite as these were measured on a different 0, 1, 2 scale, and may have a different time to resolution. Refer to Supplemental Figure 5 for plots of individual symptoms.

These symptoms were recorded on a daily symptom log, and 78% (1033/1,323) of participants returned their logs by U.S. postal mail. The missingness of symptom information averaged 25% per day (Range 21-25% by day).

#### 3.8.1 Data Table for Manuscript Figure 2, the Mean ( $\pm$ SD) total symptom severity score

|               | Metformin    |              | Ivermectin   |              | Fluvoxamine  |              |
|---------------|--------------|--------------|--------------|--------------|--------------|--------------|
|               | Active       | Control      | Active       | Control      | Active       | Control      |
| <b>Day 1</b>  | 12.43 (6.18) | 12.98 (6.45) | 12.73 (6.52) | 13.13 (6.03) | 12.48 (5.97) | 13.30 (6.02) |
| <b>Day 7</b>  | 6.48 (4.85)  | 6.57 (5.42)  | 6.35 (5.08)  | 6.57 (5.14)  | 6.49 (5.15)  | 6.72 (5.25)  |
| <b>Day 14</b> | 3.48 (4.00)  | 3.73 (4.29)  | 3.45 (4.12)  | 3.85 (4.28)  | 3.53 (4.24)  | 3.96 (4.46)  |

[Back to Top](#)

### 3.9 Figures S5. Individual Symptom Severity over time

Each row represents a different symptom, and the columns represent each medication.

Symptoms (A) through (J) were self-graded as none (0), mild (1), moderate (2), or severe (3).

#### 3.9.1 Figures S5.A-D. Symptoms over Time: Rhinorrhea, Sore Throat, Dyspnea, Cough

(A) Nasal Congestion or Rhinorrhea

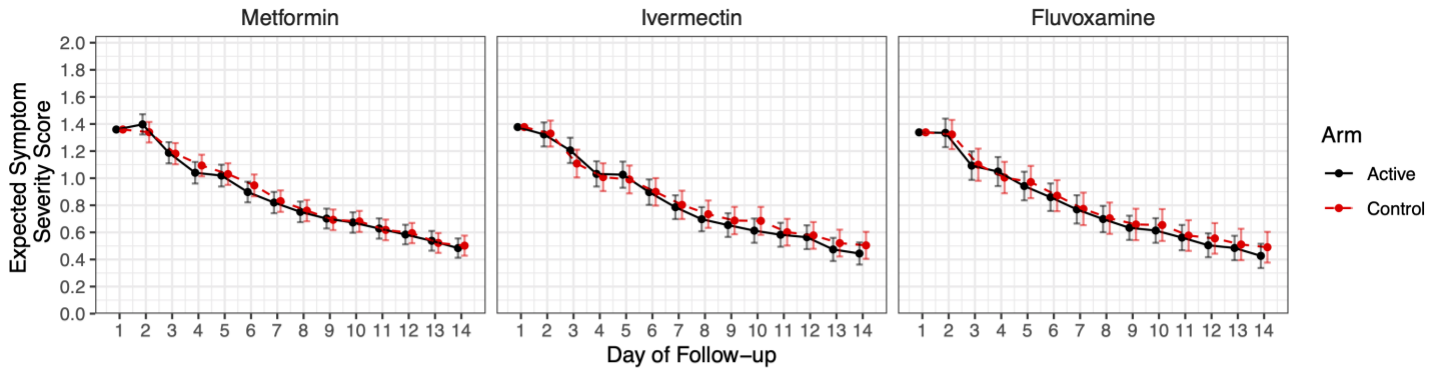

(B) Sore Throat

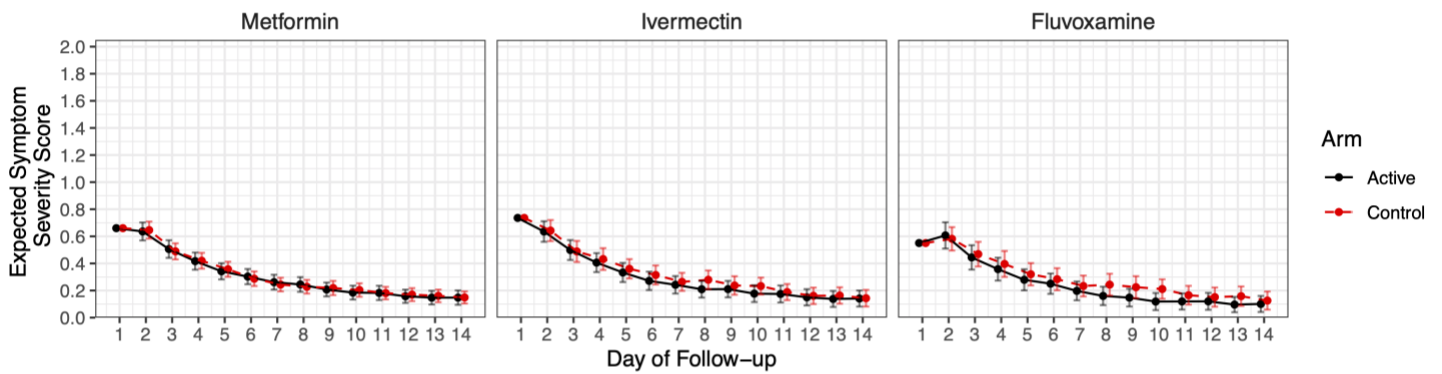

(C) Shortness of Breath or Difficulty Breathing

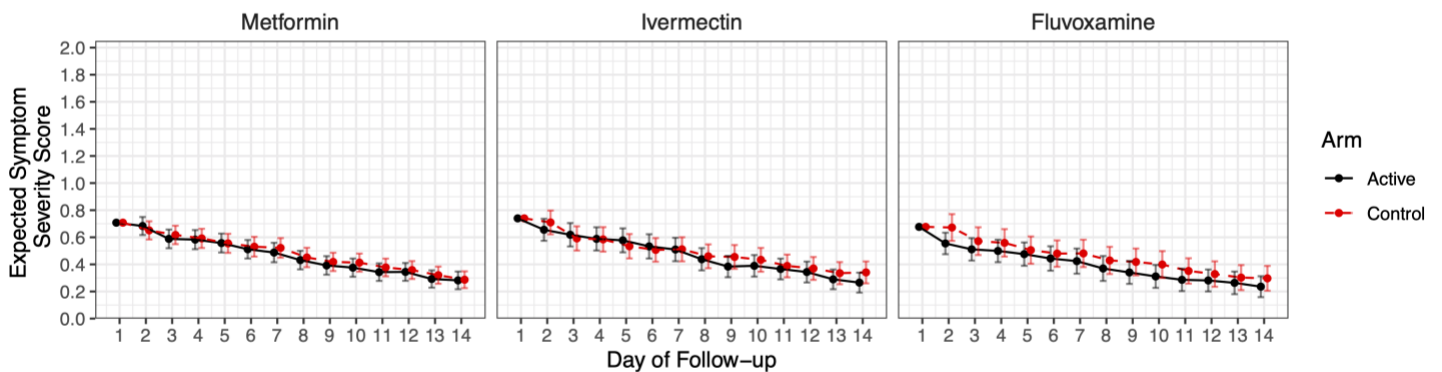

(D) Cough

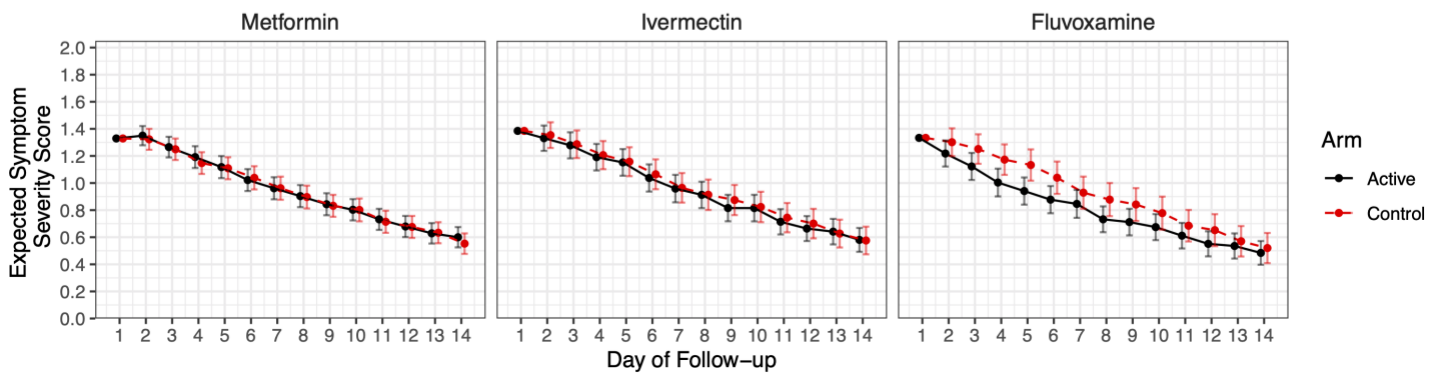

### 3.9.2 Figures S5.E-H. Symptoms over time: Fatigue, Myalgia, Headache, Chills

(E) Fatigue

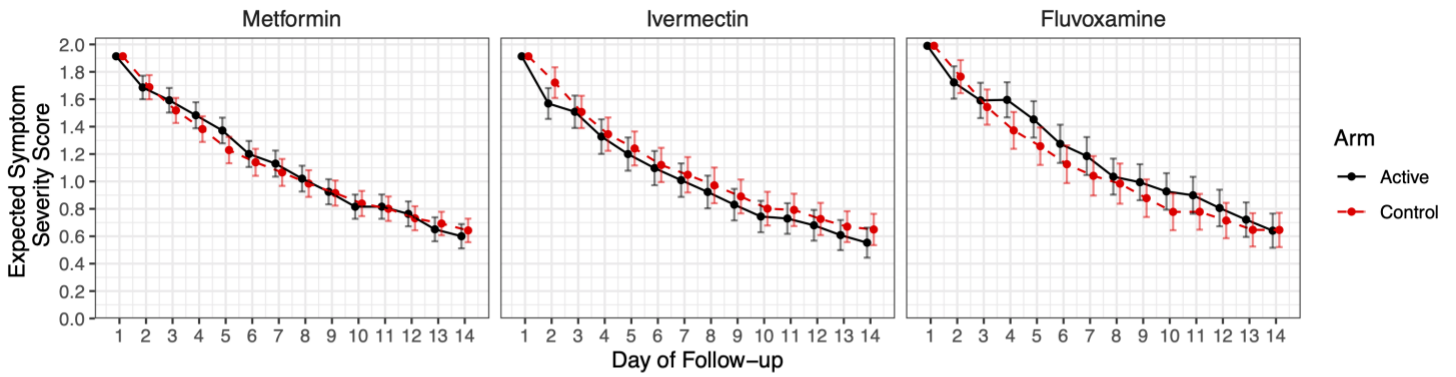

(F) Myalgia

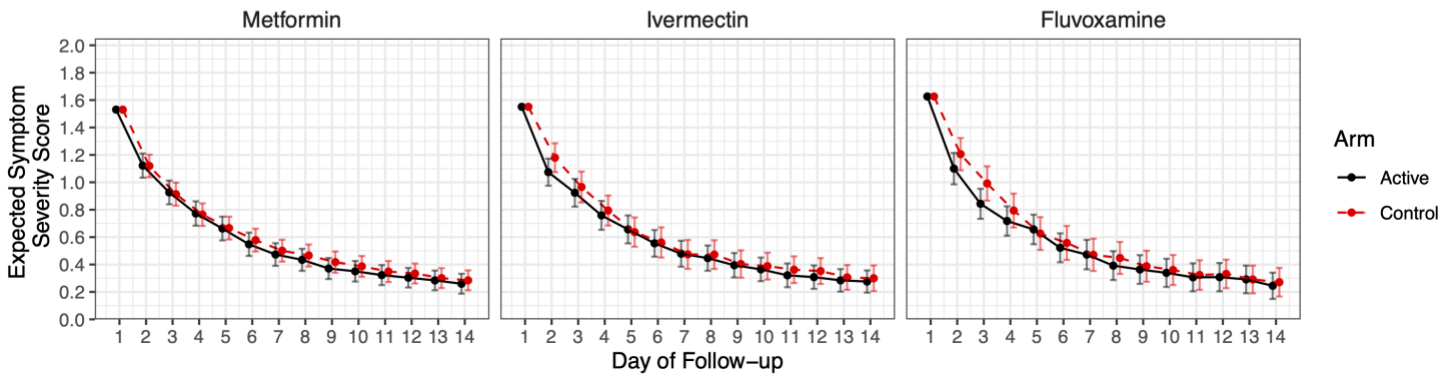

(G) Headache

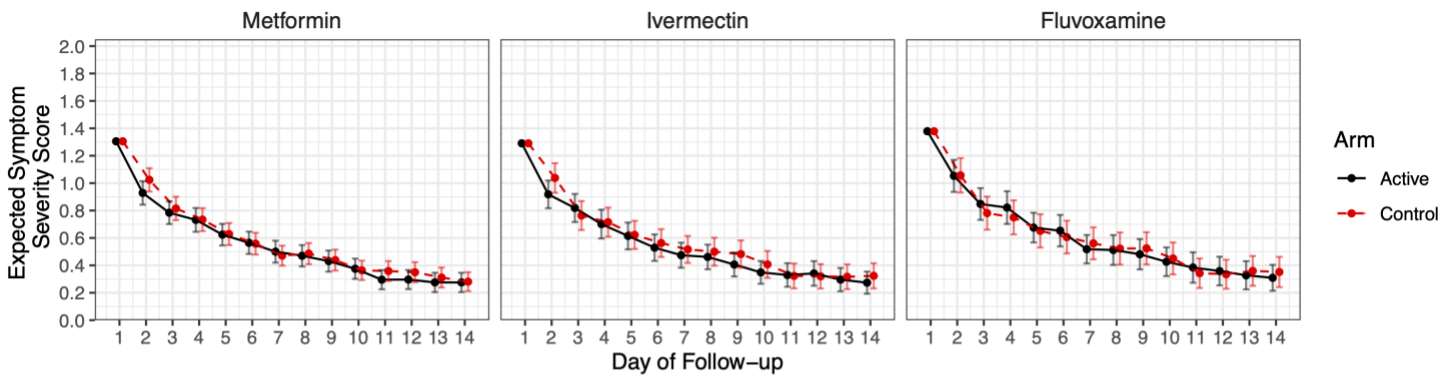

(H) Chills or Shivering

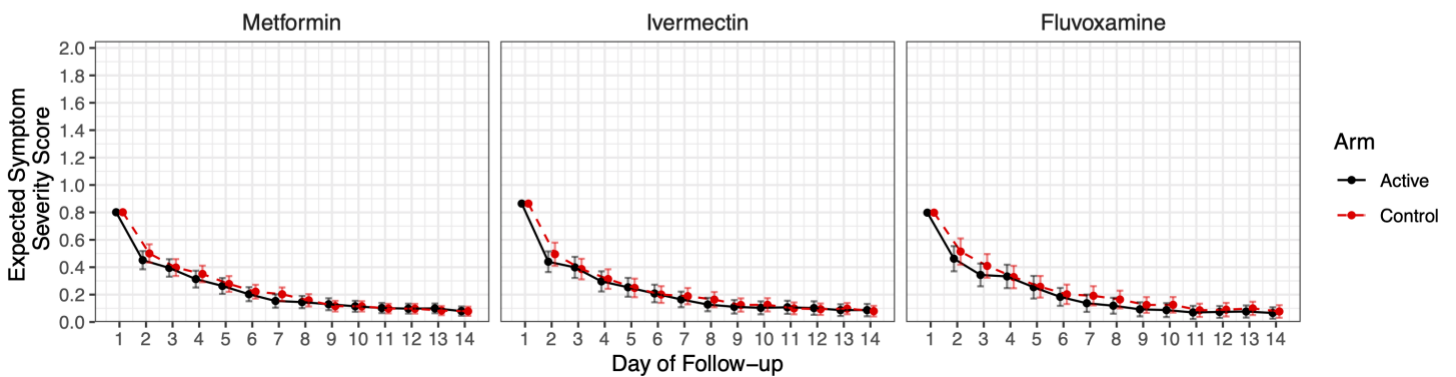



### 3.9.3 Figures S5.I-L. Symptoms over time: Fever, Nausea, Vomiting, Diarrhea

(I) Subjective Fever

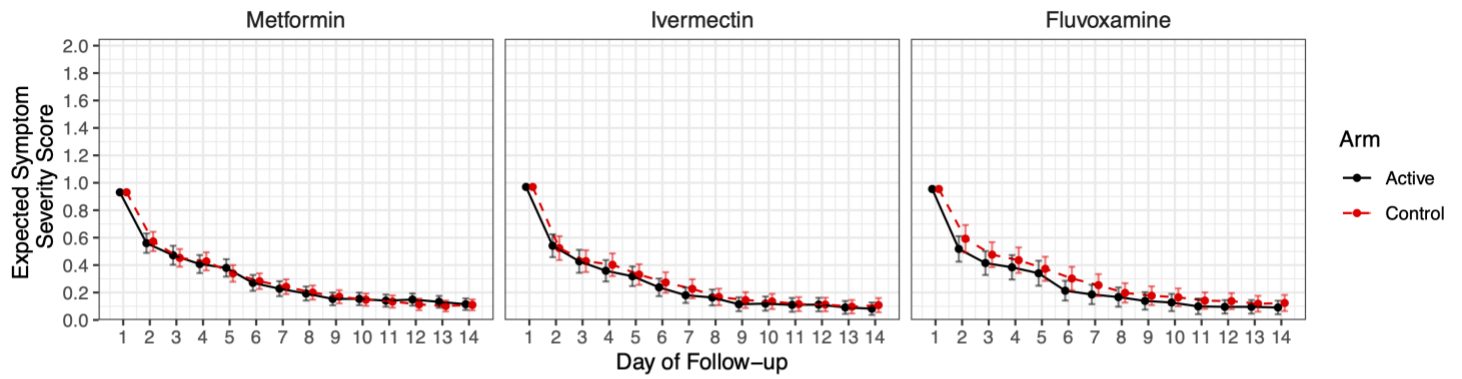

(J) Nausea

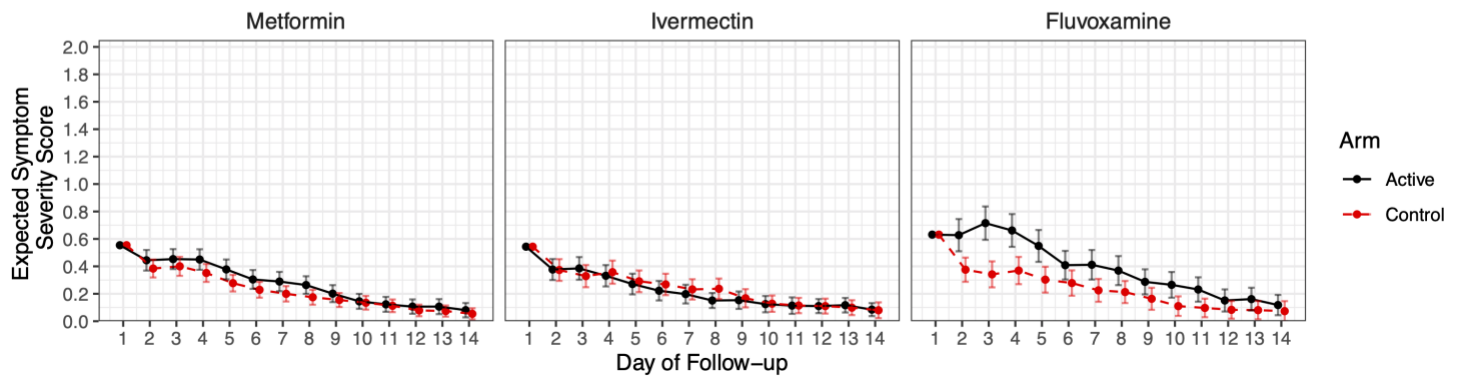

(K) Vomiting

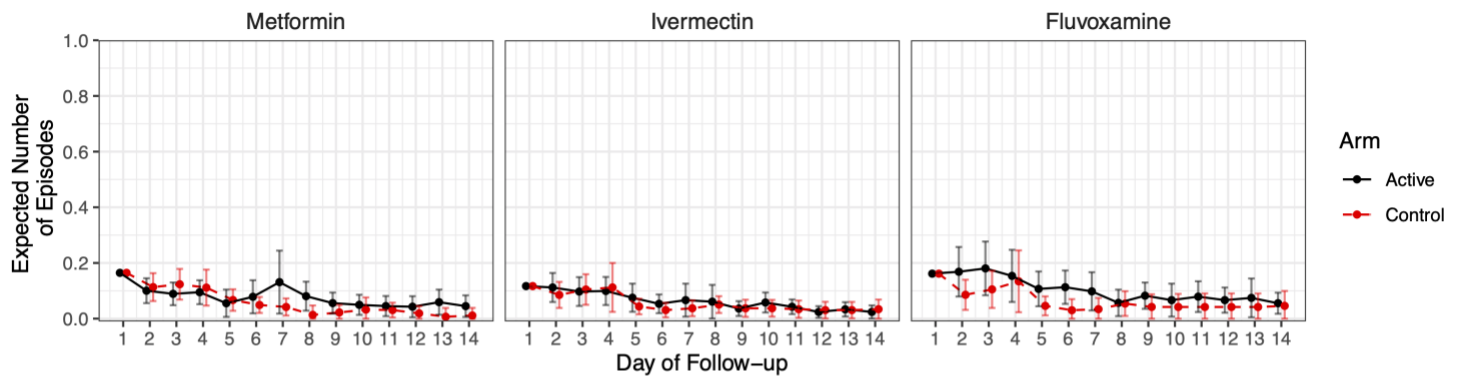

(L) Diarrhea

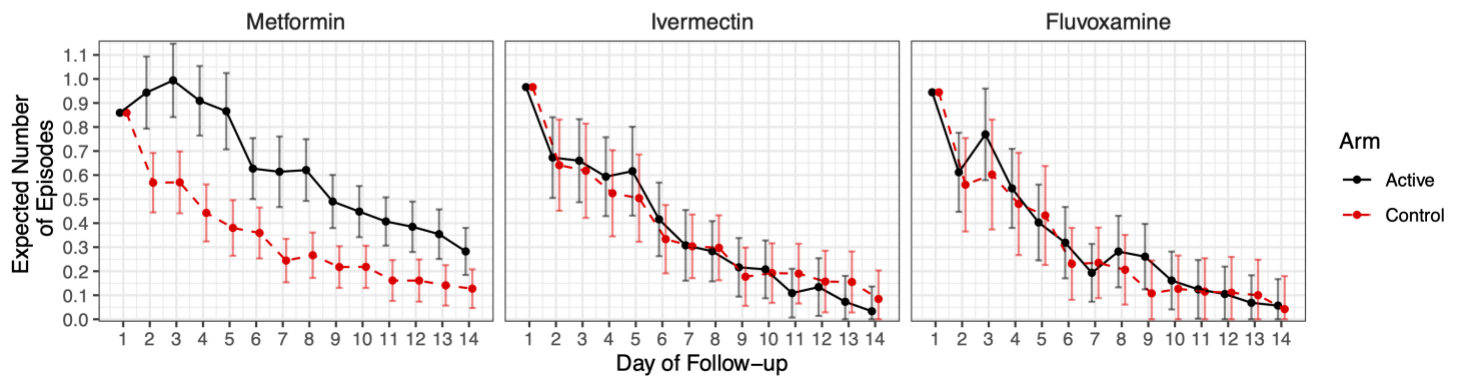

Vomiting and diarrhea were graded on a daily basis as none (0 points), 1-2 times (1 point), 3-4 times (2 points), and  $\geq 5$  times (3 points).

### 3.9.4 Figure S5.M. Symptoms over time: Loss of Smell

Loss of Smell is represented by stacked bar plots that show the percentage of individuals with the following responses: (0) = Same as Usual, (1) = Less than Usual, (2) = No Smell.

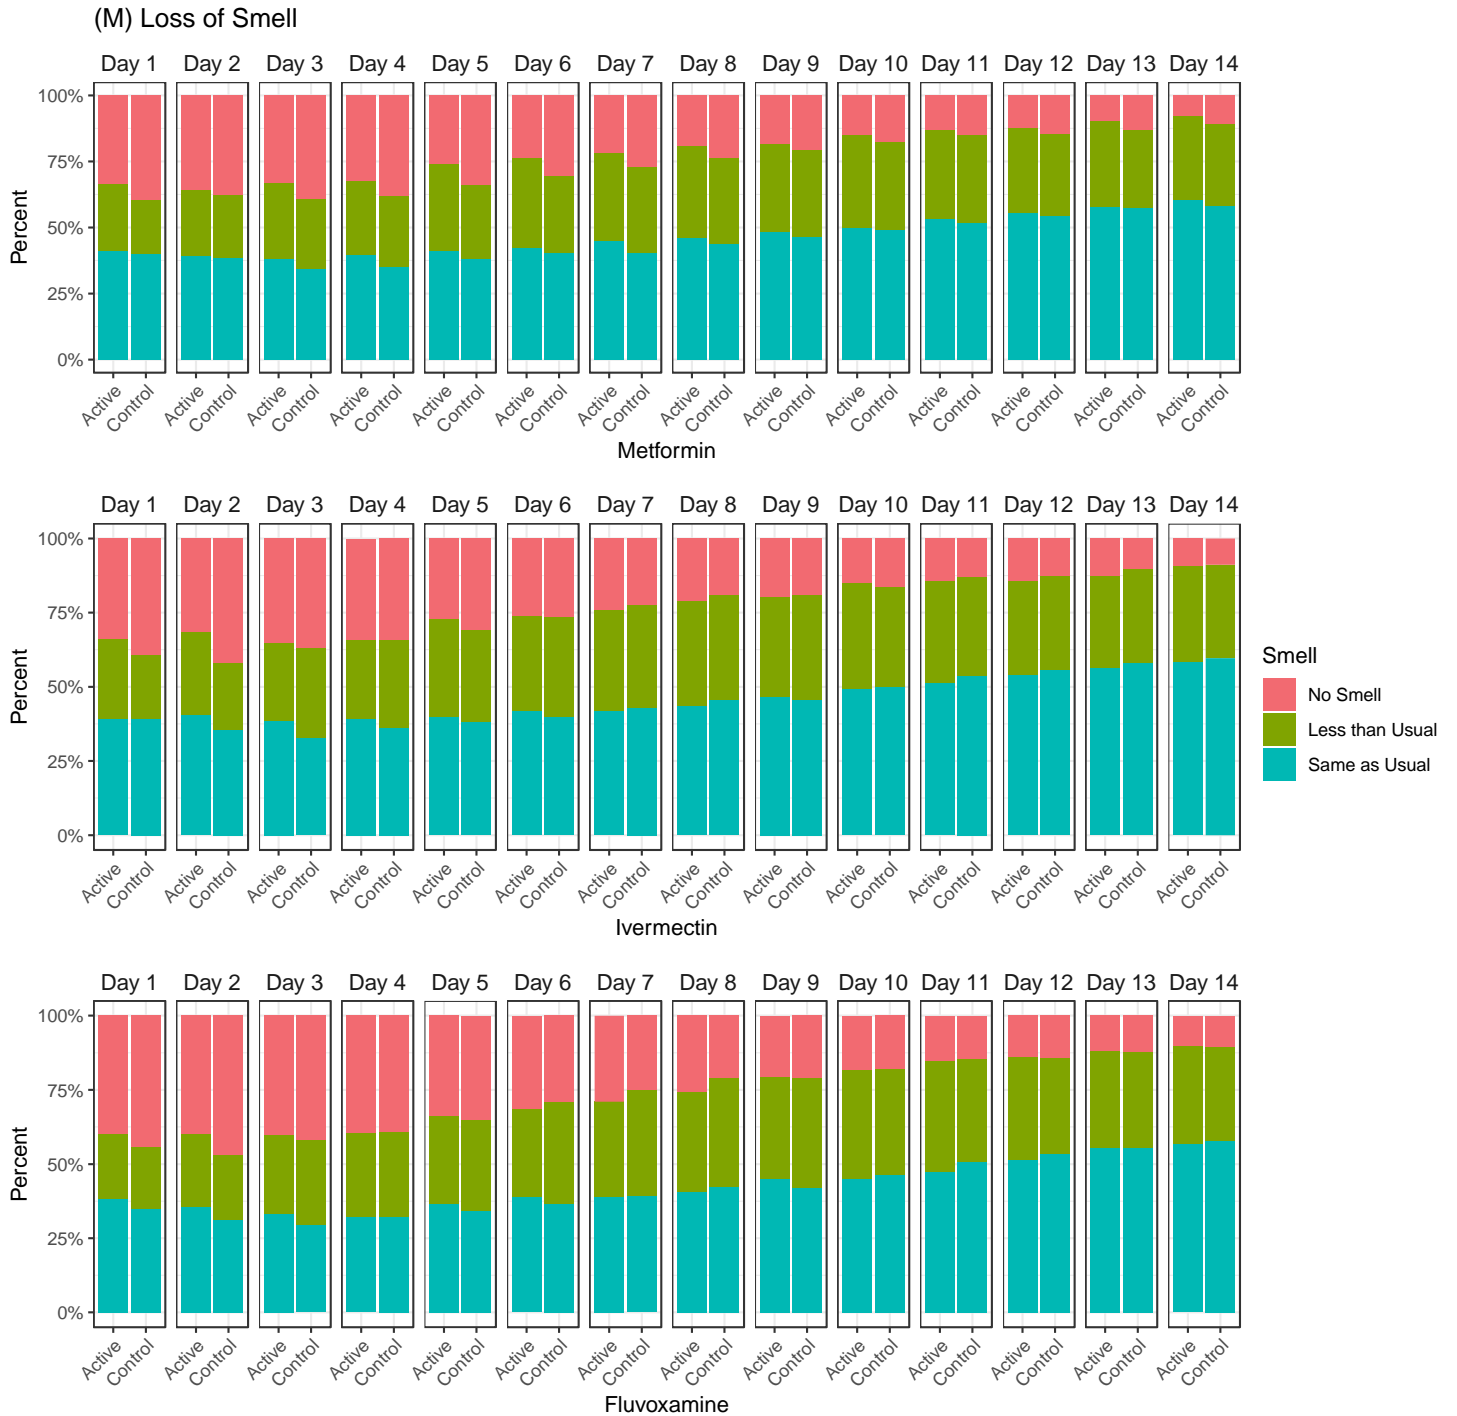

[Back to Top](#)



### 3.9.5 Figure S5.N. Symptoms over time: Loss of Taste

Loss of Taste is represented by stacked bar plots that show the percentage of individuals with the following responses: (0) = Same as Usual, (1) = Less than Usual, (2) = No Taste.

(N) Loss of Taste

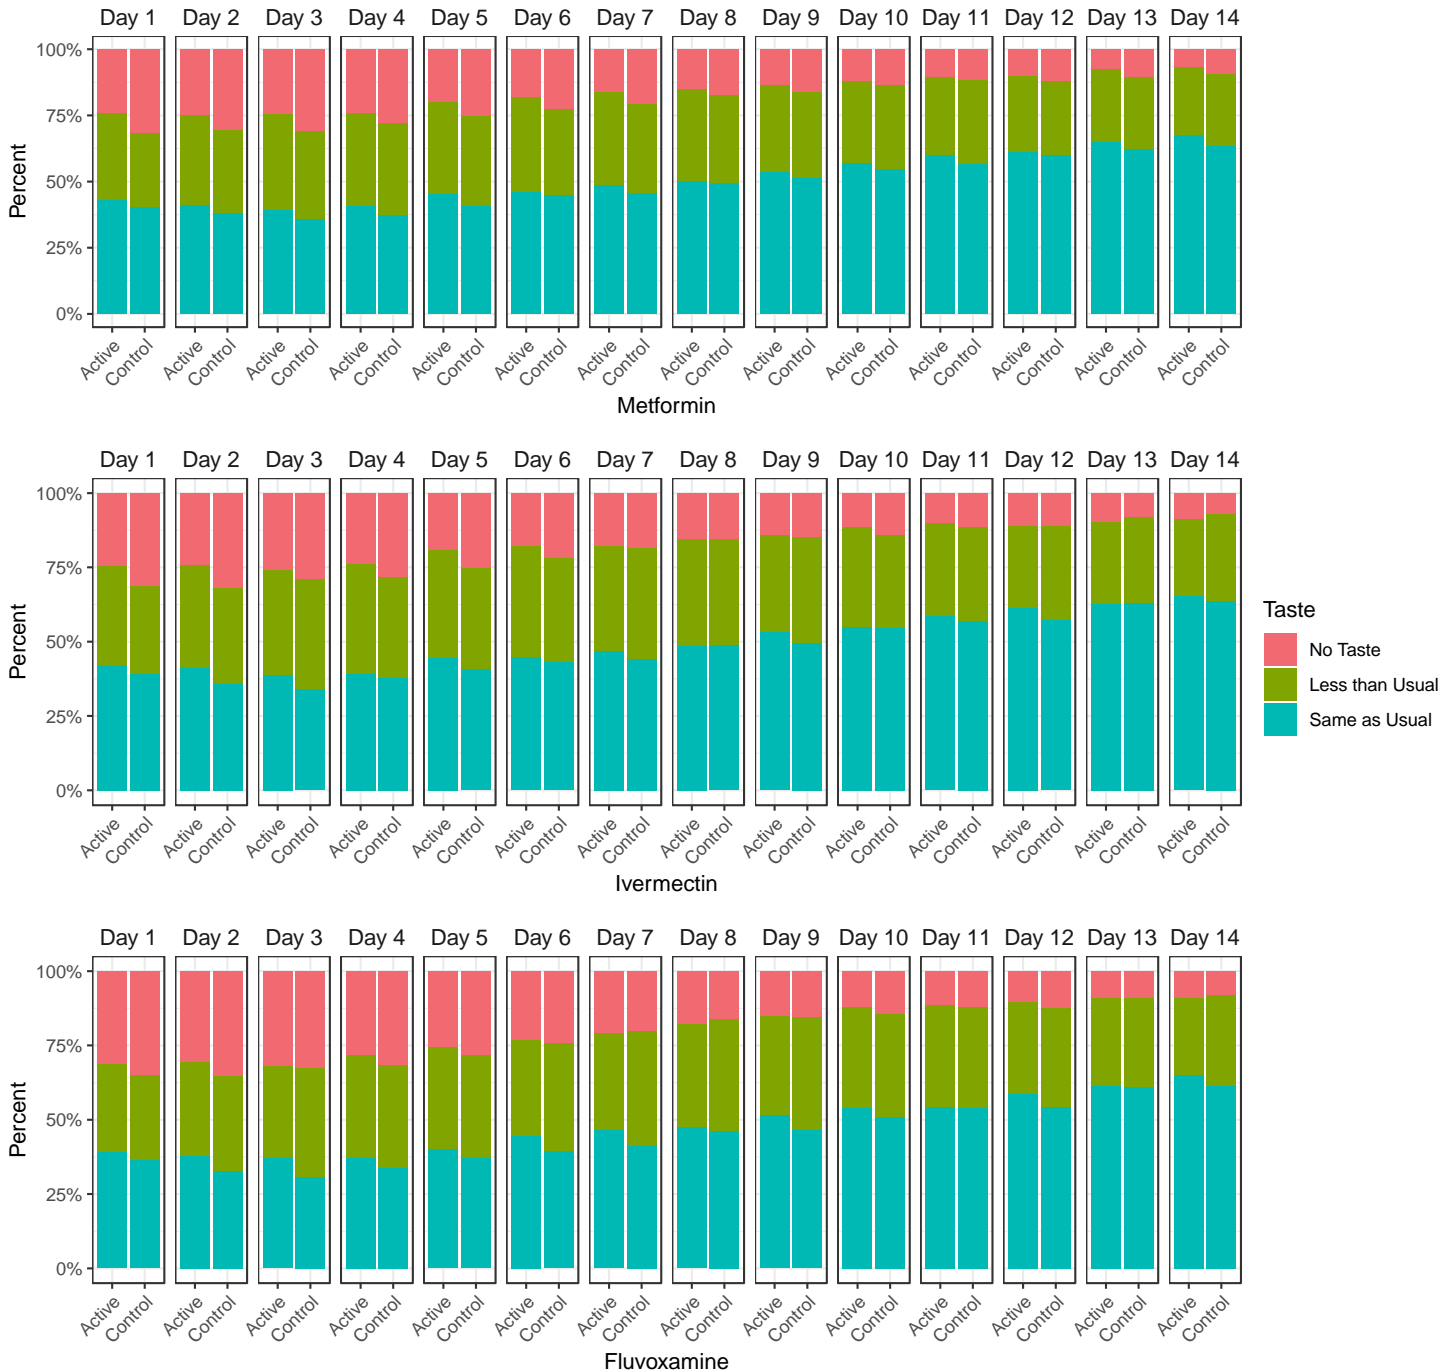

[Back to Top](#)

### 3.10 Figure S6. Factorial Interaction of Combination Therapy

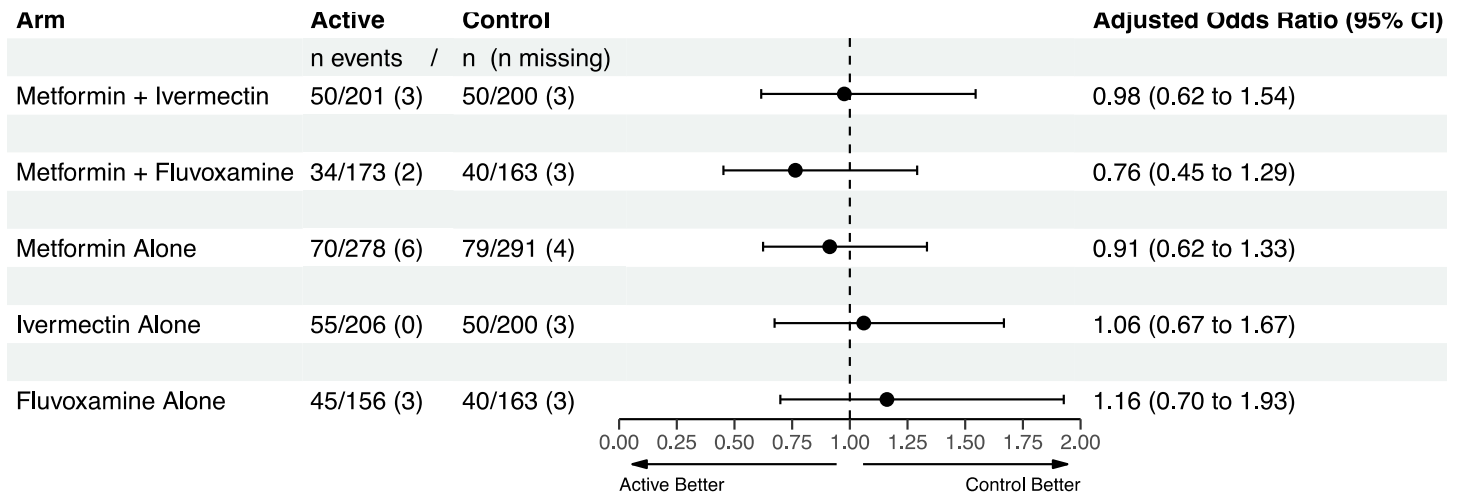

**Figure S6a.** The above is for the primary composite endpoint of hypoxemia  $\leq 93\%$ , emergency department visit, hospitalization, or death. Comparisons are against concurrent placebo controls only. The trial was not powered for these comparisons. Vertical comparison of the rows is not valid.

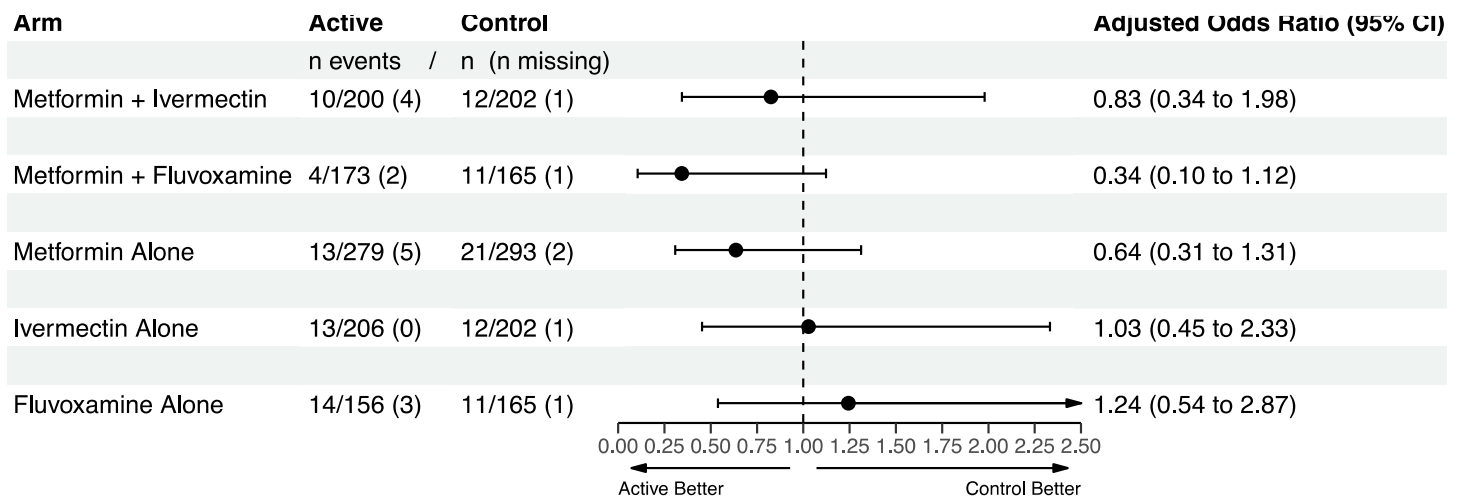

**Figure S6b.** The above is for the healthcare utilization components of the primary composite endpoint: emergency department visit, hospitalization, or death. Comparisons are against concurrent placebo controls only. The trial was not powered for these comparisons. Vertical comparison of the rows is not valid.

[Back to Top](#)

### 3.11 Figure S7. Maximum Clinical Support over 14-days in ordinal scale

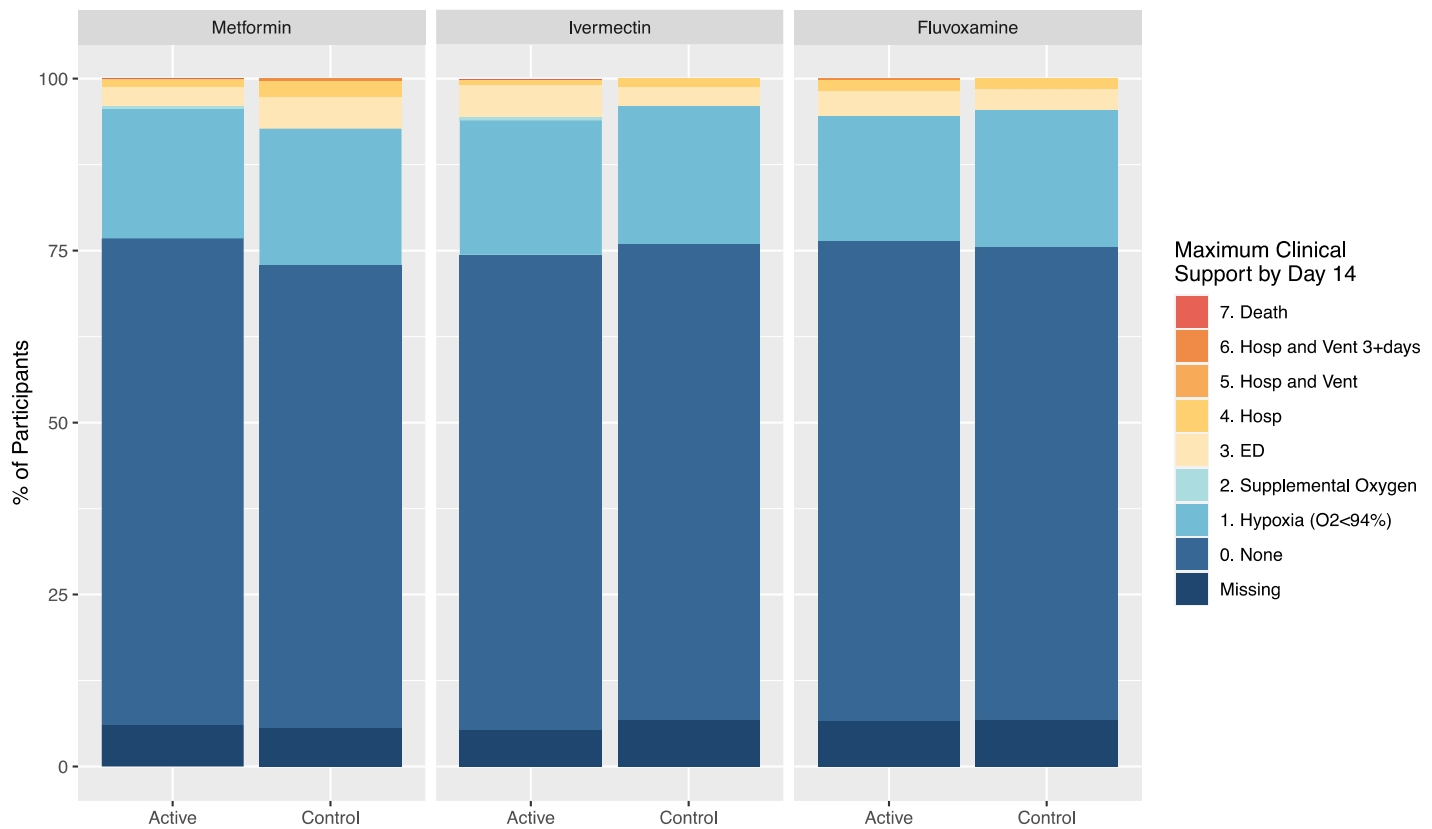

3.12 Figure S7 Data Table of Maximal Clinical Progression through Day 14:

|                                          | Metformin              |                       | Ivermectin            |                       | Fluvoxamine           |                       |
|------------------------------------------|------------------------|-----------------------|-----------------------|-----------------------|-----------------------|-----------------------|
|                                          | # (%   Cumulative %)   |                       | # (%   Cumulative %)  |                       | # (%   Cumulative %)  |                       |
|                                          | Active                 | Control               | Active                | Control               | Active                | Control               |
| <b>7. Death</b>                          | 1 (0.2%   0.2%)        | 0 (0%   0%)           | 1 (0.3%   0.3%)       | 0 (0%   0%)           | 0 (0%   0%)           | 0 (0%   0%)           |
| <b>6. Hosp &amp; Vent ≥3 days</b>        | 0 (0%   0.2%)          | 2 (0.3%   0.3%)       | 0 (0%   0.3%)         | 0 (0%   0%)           | 1 (0.3%   0.3%)       | 0 (0%   0%)           |
| <b>5. Hosp &amp; Vent</b>                | 0 (0%   0.2%)          | 0 (0%   0.3%)         | 0 (0%   0.3%)         | 0 (0%   0%)           | 0 (0%   0.3%)         | 0 (0%   0%)           |
| <b>4. Hospital</b>                       | 7 (1.1%   1.3%)        | 16 (2.6%   2.9%)      | 3 (0.8%   1%)         | 5 (1.3%   1.3%)       | 5 (1.6%   1.9%)       | 5 (1.6%   1.6%)       |
| <b>3. Emergency Dept. Visit</b>          | 19 (3%   4.3%)         | 30 (4.8%   7.7%)      | 19 (4.9%   5.9%)      | 11 (3%   4.3%)        | 12 (3.8%   5.8%)      | 10 (3.3%   4.9%)      |
| <b>2. Supplemental Oxygen</b>            | 2 (0.3%   4.7%)        | 0 (0%   7.7%)         | 2 (0.5%   6.4%)       | 0 (0%   4.3%)         | 0 (0%   5.8%)         | 0 (0%   4.9%)         |
| <b>1. Hypoxemia (O<sub>2</sub> ≤93%)</b> | 125<br>(20.1%   24.7%) | 131<br>(21%   28.7%)  | 80<br>(20.6%   27.1%) | 80<br>(21.6%   25.9%) | 61<br>(19.6%   25.3%) | 65<br>(21.3%   26.2%) |
| <b>0. None</b>                           | 469<br>(75.3%   100%)  | 444<br>(71.3%   100%) | 283<br>(72.9%   100%) | 275<br>(74.1%   100%) | 233<br>(74.7%   100%) | 225<br>(73.8%   100%) |
| <b>Missing</b>                           | 40                     | 37                    | 22                    | 27                    | 22                    | 22                    |
| <b>Adjusted Odds Ratio (95%CI)</b>       | 0.793 (0.617 - 1.019)  |                       | 1.032 (0.749 - 1.423) |                       | 0.965 (0.675 - 1.381) |                       |

Complete case analysis adjusted odds ratio estimate for worst clinical outcome through Day 14 from a proportional odds model adjusted for vaccination status and other study drugs within the factorial randomization on the modified intention to treat cohort who received study medicines.

[Back to Top](#)

### 3.13 Figure S8. Maximum Clinical Support over 28-days in ordinal scale

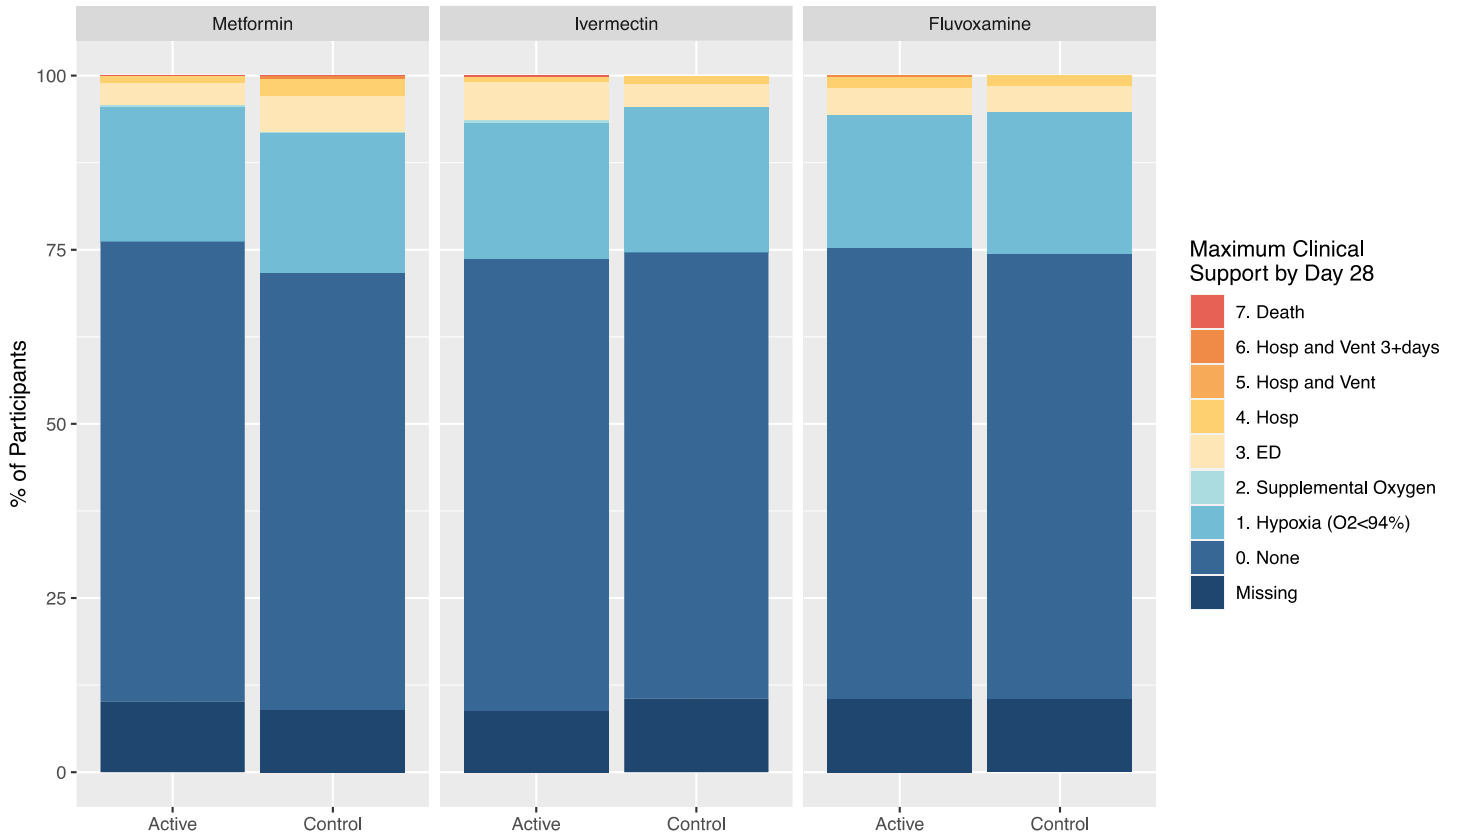

Figure S8 Data Table of Maximal Clinical Progression through Day 28:

|                                                          | Metformin              |                       | Ivermectin            |                       | Fluvoxamine           |                       |
|----------------------------------------------------------|------------------------|-----------------------|-----------------------|-----------------------|-----------------------|-----------------------|
|                                                          | # (%   Cumulative %)   |                       | # (%   Cumulative %)  |                       | # (%   Cumulative %)  |                       |
|                                                          | Active                 | Control               | Active                | Active                | Control               | Active                |
| <b>7. Death</b>                                          | 1 (0.2%   0.2%)        | 1 (0.2%   0.2%)       | 1 (0.3%   0.3%)       | 0 (0%   0%)           | 0 (0%   0%)           | 0 (0%   0%)           |
| <b>6. Hosp and Vent <math>\geq</math>3 days</b>          | 0 (0%   0.2%)          | 2 (0.3%   0.5%)       | 0 (0%   0.3%)         | 0 (0%   0%)           | 1 (0.3%   0.3%)       | 0 (0%   0%)           |
| <b>5. Hosp &amp; Vent</b>                                | 0 (0%   0.2%)          | 0 (0%   0.5%)         | 0 (0%   0.3%)         | 0 (0%   0%)           | 0 (0%   0.3%)         | 0 (0%   0%)           |
| <b>4. Hospital</b>                                       | 7 (1.2%   1.3%)        | 16 (2.7%   3.2%)      | 3 (0.8%   1.1%)       | 5 (1.4%   1.4%)       | 5 (1.7%   2%)         | 5 (1.7%   1.7%)       |
| <b>3. Emergency Dept. Visit</b>                          | 20 (3.4%   4.7%)       | 35 (5.8%   9%)        | 22 (5.9%   7%)        | 13 (3.7%   5.1%)      | 13 (4.3%   6.4%)      | 12 (4.1%   5.8%)      |
| <b>2. Supplemental Oxygen</b>                            | 2 (0.3%   5%)          | 1 (0.2%   9.2%)       | 2 (0.5%   7.5%)       | 0 (0%   5.1%)         | 0 (0%   6.4%)         | 0 (0%   5.8%)         |
| <b>1. Hypoxemia (O<sub>2</sub> <math>\leq</math>93%)</b> | 128<br>(21.5%   26.5%) | 132<br>(22%   31.1%)  | 80<br>(21.4%   28.9%) | 83<br>(23.3%   28.4%) | 64<br>(21.4%   27.8%) | 67<br>(22.9%   28.7%) |
| <b>0. None</b>                                           | 438<br>(73.5%   100%)  | 414<br>(68.9%   100%) | 266<br>(71.1%   100%) | 255<br>(71.6%   100%) | 216<br>(72.2%   100%) | 209<br>(71.3%   100%) |
| <b>Missing</b>                                           | 67                     | 59                    | 36                    | 42                    | 35                    | 34                    |
| <b>Adjusted Odds Ratio (95% CI)</b>                      | 0.817 (0.635 - 1.051)  |                       | 1.069 (0.774 - 1.476) |                       | 0.969 (0.674 - 1.391) |                       |

Complete case analysis adjusted odds ratio estimate for worst clinical outcome through Day 28 from a proportional odds model adjusted for vaccination status and other study drugs within the factorial randomization on the modified intention to treat cohort who received study medicines. By day 28, 1.34% (8/596) of those receiving metformin were hospitalized or died compared to 3.16% (19/601) of controls.

[Back to Top](#)

### 3.14 Figure S8. Time to Study Drug Initiation over Time

This is a stacked bar graph showing the mean days from symptom onset to initiation of study drug (total column height), with the lower part of each bar showing the time from randomization to initiation of study drug (subset of total column height). The y axis represents mean days, the x axis represents the week of enrollment. Factors like holidays, blizzards, and surges were noted to affect these times because of both limitations in testing and shipping during those times. Couriers were utilized for medicine delivery which in some locales allowed for same day study drug initiation. Enrollment and shipping generally occurred 7 days per week. The mean time from enrollment to study drug initiation was 0.998 ( $\pm$  0.95) days.

**Average Days of Symptoms to Study Drug Initiation across weeks of the trial**

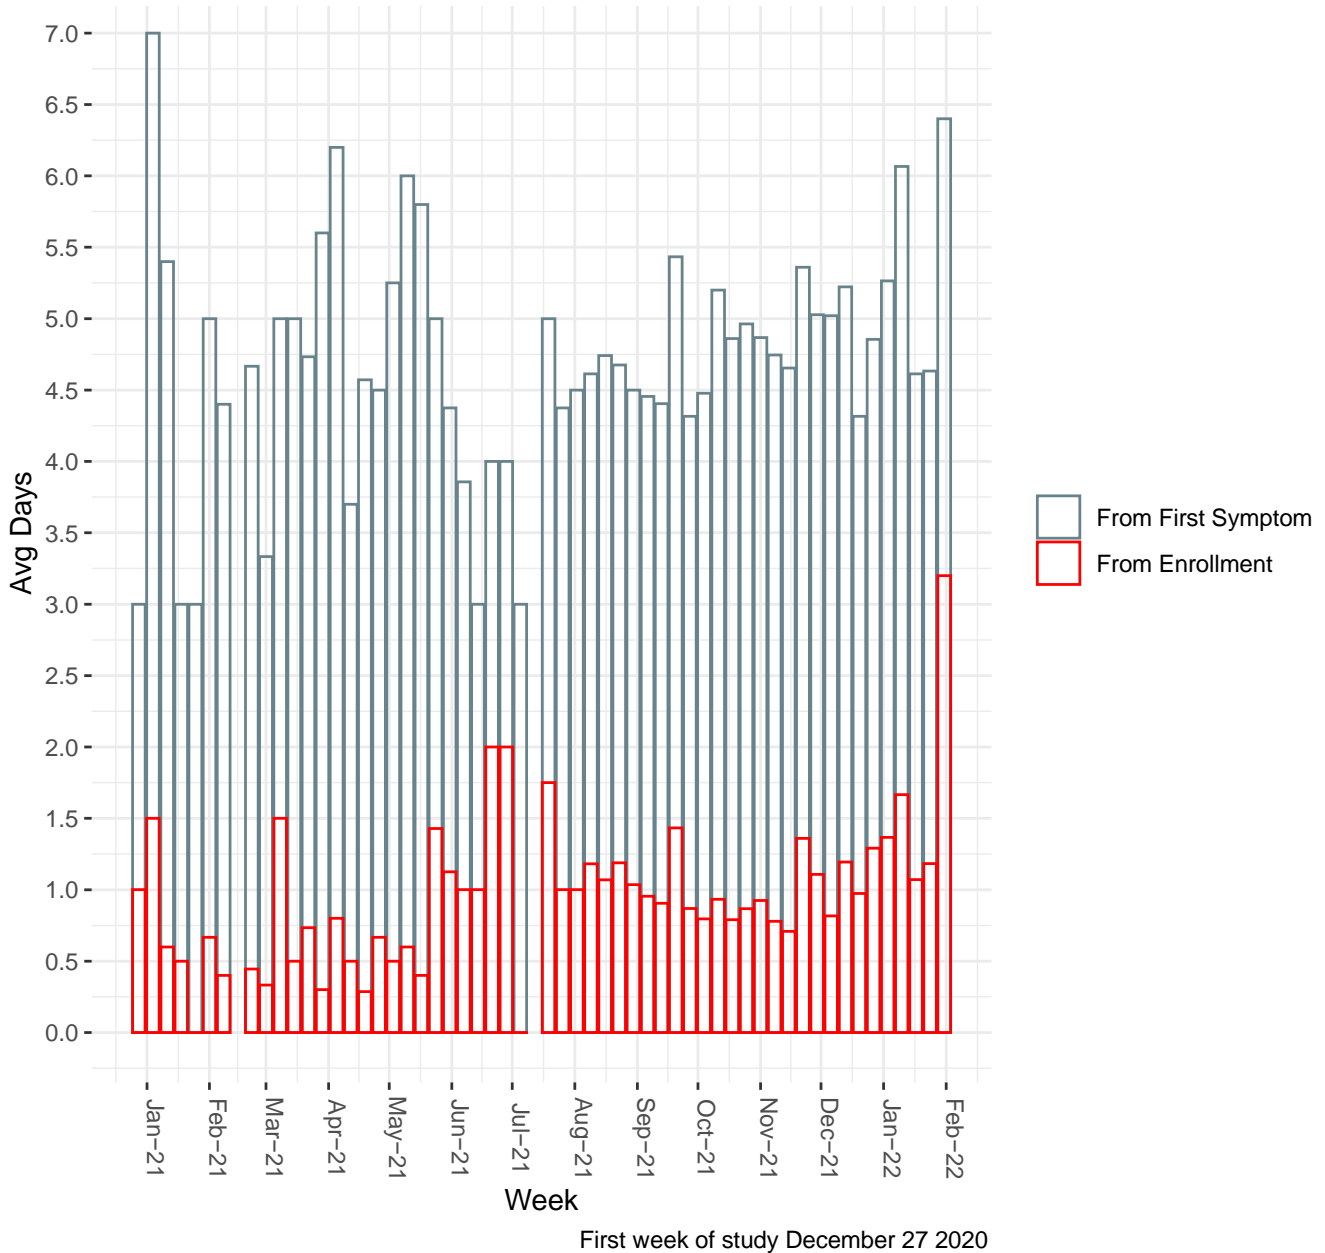

[Back to Top](#)

### 3.15 Figure S9. Pictures of Study Medicine and Matched Placebo

This is a picture of the medications and their exact-matching placebo tablets. The top row is metformin, the middle row is ivermectin, and the third row is fluvoxamine. Medicines were dispensed in pill boxes.

**Metformin and Metformin placebo, 2 views**

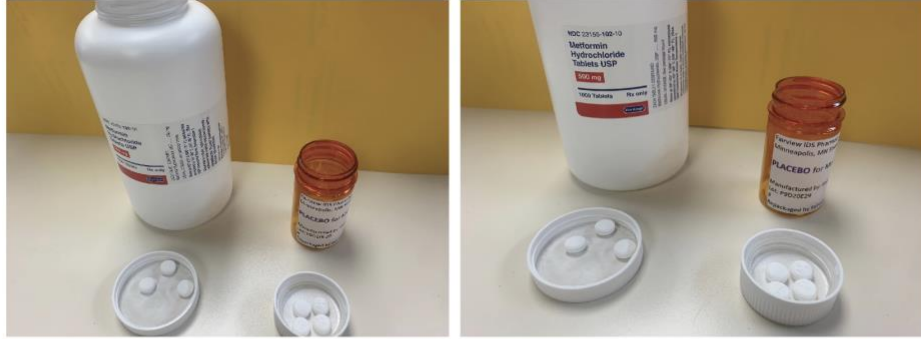

**Ivermectin and ivermectin placebo, 7mg on the Left and 14mg on the Right**

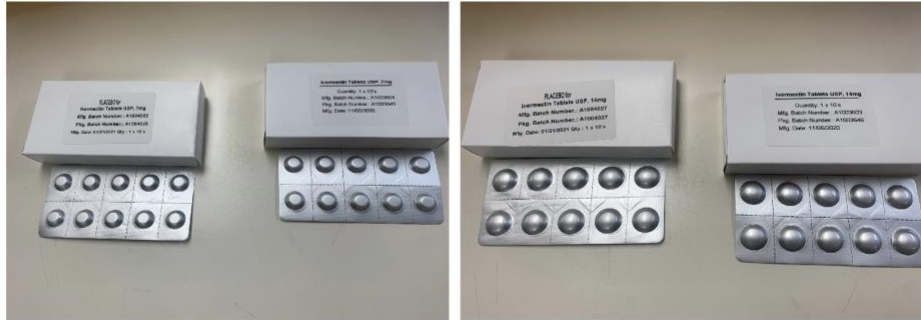

**Fluvoxamine and fluvoxamine placebo, 2 views**

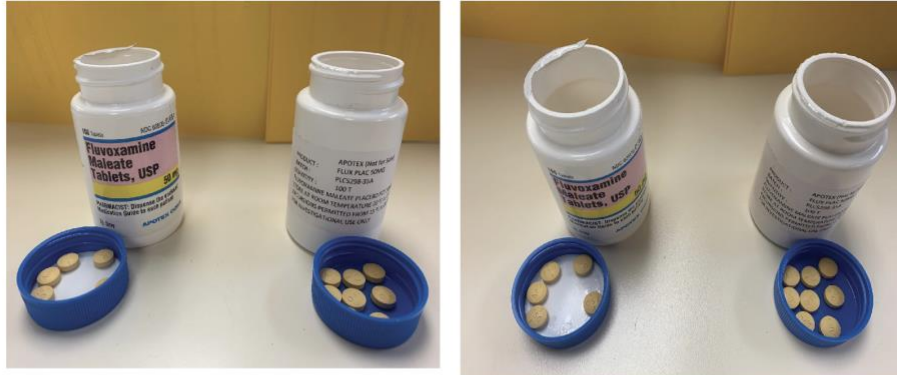

**Pill boxes (week 2 on the top, week 1 on the bottom)**

The days of the week were covered with stickers denoting the day of the study involvement (because not all started the study on a Monday)

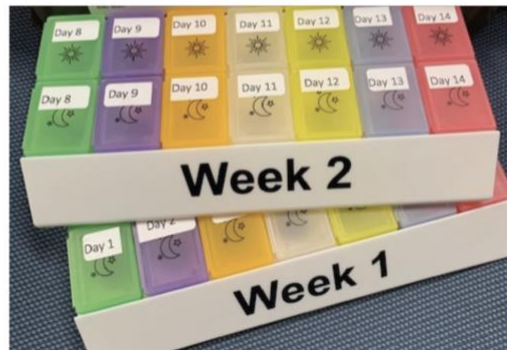

[Back to Top](#)

## 4 Supplementary Tables

### 4.1 Table S1. Study Medication Adherence

| Adherence            | Overall<br>N = 1,323 | Metformin<br>N = 284 | Metformin+<br>Ivermectin<br>N = 204 | Metformin+<br>Fluvoxamine<br>N = 175 | Ivermectin<br>N = 206 | Fluvoxamine<br>N = 159 | Placebo<br>N = 295 |
|----------------------|----------------------|----------------------|-------------------------------------|--------------------------------------|-----------------------|------------------------|--------------------|
| 70-100%              | 1,015 (77)           | 208 (73)             | 165 (81)                            | 116 (66)                             | 175 (85)              | 121 (76)               | 230 (78)           |
| 35-70%               | 102 (7.7)            | 20 (7.0)             | 20 (9.8)                            | 17 (9.7)                             | 11 (5.3)              | 16 (10)                | 18 (6.1)           |
| 0-35%                | 139 (11)             | 36 (13)              | 9 (4.4)                             | 33 (19)                              | 14 (6.8)              | 16 (10)                | 31 (11)            |
| Missing<br>Adherence | 67 (5.1)             | 20 (7.0)             | 10 (4.9)                            | 9 (5.1)                              | 6 (2.9)               | 6 (3.8)                | 16 (5.4)           |

Data represent n (%).

[Back to Top](#)

#### 4.2 Table S2. Study Medication Interruption, Missed Doses, and/or Discontinuation

| Reason, n (%)                                              | Overall<br>n = 1323 | Metformin<br>n = 284 | Ivermectin<br>n = 206 | Fluvoxamine<br>n = 159 | Metformin+<br>Ivermectin<br>n = 204 | Metformin+<br>Fluvoxamine<br>n = 175 | Placebo<br>n = 295 |
|------------------------------------------------------------|---------------------|----------------------|-----------------------|------------------------|-------------------------------------|--------------------------------------|--------------------|
| Total Interruption or Discontinuation                      | 365(28)             | 81 (29)              | 41 (20)               | 48 (30)                | 51 (25)                             | 69 (40)                              | 75 (25)            |
| Restart after interruption, n (%) of those who interrupted | 116 (32)            | 25 (31)              | 15 (37)               | 13 (27)                | 19 (37)                             | 16 (23)                              | 28 (37)            |
| Resolution of symptoms                                     | 36 (3)              | 7 (3)                | 3 (2)                 | 6 (4)                  | 7 (3)                               | 5 (3)                                | 8 (3)              |
| ER visit, not hospitalized                                 | 6 (1)               | 1 (0)                | 3 (2)                 | 1 (1)                  | 1 (1)                               | 0 (0)                                | 0 (0)              |
| Hospitalization                                            | 18 (1)              | 5 (2)                | 0 (0)                 | 2 (1)                  | 2 (1)                               | 0 (0)                                | 9 (3)              |
| Physician prescribed alternate therapy or advised against  | 4 (0)               | 0 (0)                | 1 (1)                 | 0 (0)                  | 1 (1)                               | 0 (0)                                | 2 (1)              |
| Receipt of FDA EUA therapy                                 | 5 (0)               | 1 (0)                | 1 (1)                 | 0 (0)                  | 0 (0)                               | 1 (1)                                | 2 (1)              |
| Allergic reaction (rash, hives)                            | 4 (0)               | 1 (0)                | 0 (0)                 | 0 (0)                  | 0 (0)                               | 0 (0)                                | 3 (1)              |
| Forgetting or lost study medicine                          | 48 (4)              | 9 (3)                | 8 (4)                 | 5 (3)                  | 8 (4)                               | 6 (3)                                | 12 (4)             |
| Nausea                                                     | 90 (7)              | 18 (6)               | 7 (3)                 | 15 (9)                 | 9 (4)                               | 27 (15)                              | 14 (5)             |
| Vomiting                                                   | 23 (2)              | 6 (2)                | 1 (1)                 | 3 (2)                  | 6 (3)                               | 4 (2)                                | 3 (1)              |
| Diarrhea                                                   | 78 (6)              | 23 (8)               | 7 (3)                 | 7 (4)                  | 11 (5)                              | 21 (12)                              | 9 (3)              |
| Stomach upset / gastritis                                  | 88 (7)              | 19 (7)               | 3 (2)                 | 16 (10)                | 16 (8)                              | 20 (11)                              | 14 (5)             |
| Bloating                                                   | 10 (1)              | 2 (1)                | 1 (1)                 | 3 (2)                  | 1 (1)                               | 2 (1)                                | 1 (0)              |
| Constipation                                               | 4 (0)               | 1 (0)                | 0 (0)                 | 1 (1)                  | 2 (1)                               | 0 (0)                                | 0 (0)              |
| Abdominal pain                                             | 5 (0)               | 0 (0)                | 0 (0)                 | 2 (1)                  | 1 (1)                               | 1 (1)                                | 1 (0)              |
| Loss of appetite                                           | 3 (0)               | 0 (0)                | 0 (0)                 | 1 (1)                  | 0 (0)                               | 2 (1)                                | 0 (0)              |
| Headache                                                   | 31 (2)              | 7 (3)                | 3 (2)                 | 7 (4)                  | 4 (2)                               | 7 (4)                                | 3 (1)              |
| Dizziness, vertigo, or tinnitus                            | 15 (1)              | 4 (1)                | 0 (0)                 | 4 (3)                  | 1 (1)                               | 4 (2)                                | 2 (1)              |
| Insomnia                                                   | 13 (1)              | 0 (0)                | 1 (1)                 | 5 (3)                  | 0 (0)                               | 5 (3)                                | 2 (1)              |
| Fear of side effects or stigma                             | 10 (1)              | 4 (1)                | 2 (1)                 | 0 (0)                  | 2 (1)                               | 1 (1)                                | 1 (0)              |
| Anxiety, mood swings, brain fog, feeling jittery, tremors  | 20 (2)              | 1 (0)                | 2 (1)                 | 7 (4)                  | 1 (1)                               | 9 (5)                                | 0 (0)              |
| Feeling too ill, fatigued or too overwhelmed to continue   | 29 (2)              | 11 (4)               | 2 (1)                 | 5 (3)                  | 1 (1)                               | 6 (3)                                | 4 (1)              |
| Menstrual effects                                          | 2 (0)               | 1 (0)                | 0 (0)                 | 0 (0)                  | 0 (0)                               | 0 (0)                                | 1 (0)              |
| Symptoms worsening                                         | 15 (1)              | 5 (2)                | 4 (2)                 | 2 (1)                  | 2 (1)                               | 0 (0)                                | 2 (1)              |
| Impacts return to work, lifestyle                          | 8 (1)               | 1 (0)                | 0 (0)                 | 3 (1)                  | 1 (1)                               | 3 (2)                                | 1 (0)              |
| Dry mouth                                                  | 4 (0)               | 0 (0)                | 0 (0)                 | 2 (1)                  | 1 (1)                               | 1 (1)                                | 0 (0)              |
| Loss of taste/smell or developing foul taste/smell         | 5 (0)               | 0 (0)                | 0 (0)                 | 1 (1)                  | 2 (1)                               | 2 (1)                                | 0 (0)              |
| Eye or vision issues                                       | 4 (0)               | 0 (0)                | 2 (1)                 | 0 (0)                  | 1 (1)                               | 1 (1)                                | 0 (0)              |
| Other stated reasons                                       | 257 (19)            | 58 (20)              | 30 (15)               | 38 (24)                | 33 (16)                             | 41 (23)                              | 57 (19)            |
| Unknown reason                                             | 44 (3)              | 10 (4)               | 8 (4)                 | 4 (3)                  | 7 (3)                               | 5 (3)                                | 10 (3)             |



### 4.3 Table S3. Additional Open-label Therapeutics Utilized after Randomization

| Variable                   | Overall<br>n = 1,323 | Metformin<br>n = 284 | Metformin+<br>Ivermectin<br>n = 204 | Metformin+<br>Fluvoxamine<br>n = 175 | Ivermectin<br>n = 206 | Fluvoxamine<br>n = 159 | Placebo<br>n = 295 |
|----------------------------|----------------------|----------------------|-------------------------------------|--------------------------------------|-----------------------|------------------------|--------------------|
| <b>Monoclonal Antibody</b> | 55 (4.2)             | 13 (4.6)             | 9 (4.4)                             | 8 (4.6)                              | 6 (2.9)               | 7 (4.4)                | 12 (4.1)           |
| <b>Ivermectin</b>          | 8 (0.6)              | 3 (1.1)              | 1 (0.5)                             | 0 (0)                                | 2 (1.0)               | 0 (0)                  | 2 (0.7)            |
| <b>Inhaler</b>             | 30 (2.3)             | 8 (2.8)              | 4 (2.0)                             | 3 (1.7)                              | 2 (1.0)               | 2 (1.3)                | 11 (3.7)           |
| <b>Anti-coagulants</b>     | 19 (1.4)             | 7 (2.5)              | 1 (0.5)                             | 1 (0.6)                              | 1 (0.5)               | 4 (2.5)                | 5 (1.7)            |
| <b>Outpatient Steroids</b> | 20 (1.5)             | 3 (1.1)              | 5 (2.5)                             | 2 (1.1)                              | 2 (1.0)               | 5 (3.1)                | 3 (1.0)            |
| <b>Other*</b>              | 165 (12)             | 36 (13)              | 31 (15)                             | 11 (6.3)                             | 27 (13)               | 20 (13)                | 40 (14)            |
| <b>Sertraline †</b>        | 35 (2.6)             | 12 (4.2)             | 2 (1.0)                             | 3 (1.7)                              | 5 (2.4)               | 2 (1.3)                | 11 (3.7)           |

Values are n (%).

\* Other includes a wide variety of non-FDA EUA therapies.

† Sertraline is an antagonist to sigma-1 receptors, whereas fluvoxamine is an agonist.<sup>18</sup>

[Back to Top](#)

**4.4 Table S4. Complete Case Analysis of the primary outcome in the modified intention to treat population.**

| <b>Metformin</b>                                |                            |          |                        |          |                            |                 |
|-------------------------------------------------|----------------------------|----------|------------------------|----------|----------------------------|-----------------|
| <b>Outcome</b>                                  | <b>Metformin (n=663)</b>   | <b>%</b> | <b>Control (n=660)</b> | <b>%</b> | <b>Adjusted Odds Ratio</b> | <b>95% CI</b>   |
| Primary Composite                               | 154/650                    | 23.7     | 179/651                | 27.5     | 0.841                      | (0.653 - 1.082) |
| Hypoxemia $\leq$ 93% only                       | 147/648                    | 22.7     | 158/649                | 24.3     | 0.940                      | (0.725 - 1.218) |
| Emergency Dept visit, hospitalization, or death | 27/650                     | 4.2      | 48/653                 | 7.4      | 0.570                      | (0.35 - 0.929)  |
| Hospitalization or death                        | 8/649                      | 1.2      | 18/653                 | 2.8      | 0.463                      | (0.199 - 1.078) |
| Death                                           | 1/654                      | 0.2      | 0/653                  | 0.0      |                            |                 |
| <b>Ivermectin</b>                               |                            |          |                        |          |                            |                 |
| <b>Outcome</b>                                  | <b>Ivermectin (n=410)</b>  | <b>%</b> | <b>Control (n=398)</b> | <b>%</b> | <b>Adjusted Odds Ratio</b> | <b>95% CI</b>   |
| Primary Composite                               | 105/406                    | 25.9     | 96/390                 | 24.6     | 1.051                      | (0.761 - 1.452) |
| Hypoxemia $\leq$ 93% only                       | 96/405                     | 23.7     | 88/389                 | 22.6     | 1.044                      | (0.748 - 1.457) |
| Emergency Dept visit, hospitalization, or death | 23/405                     | 5.7      | 16/393                 | 4.1      | 1.382                      | (0.715 - 2.673) |
| Hospitalization or death                        | 4/405                      | 1.0      | 5/393                  | 1.3      | 0.737                      | (0.195 - 2.784) |
| Death                                           | 1/407                      | 0.2      | 0/395                  | 0.0      |                            |                 |
| <b>Fluvoxamine</b>                              |                            |          |                        |          |                            |                 |
| <b>Outcome</b>                                  | <b>Fluvoxamine (n=334)</b> | <b>%</b> | <b>Control (n=327)</b> | <b>%</b> | <b>Adjusted Odds Ratio</b> | <b>95% CI</b>   |
| Primary Composite                               | 79/327                     | 24.2     | 80/320                 | 25.0     | 0.949                      | (0.661 - 1.363) |
| Hypoxemia $\leq$ 93% only                       | 71/326                     | 21.8     | 73/319                 | 22.9     | 0.930                      | (0.64 - 1.351)  |
| Emergency Dept visit, hospitalization, or death | 18/327                     | 5.5      | 15/323                 | 4.6      | 1.169                      | (0.571 - 2.394) |
| Hospitalization or death                        | 6/327                      | 1.8      | 5/323                  | 1.5      | 1.12                       | (0.332 - 3.778) |
| Death                                           | 0/328                      | 0.0      | 0/324                  | 0.0      |                            |                 |

† Odds ratio reflects outcome defined as the corresponding component or worse, adjusted for vaccination status and the factorial design.

Figures reflect the # with event / # with complete data in the modified intention to treat cohort. The number with incomplete data reflects the number of people with a missing outcome or unknown vaccination status (n=5). Additionally, results are also consistent when not excluding the participants with a missing vaccination status and treating them as unvaccinated (data not shown).

[Back to Top](#)

**4.5 Table S5. Comparison of Background Information on race, ethnicity, age, sex of the broader population affected by SARS-CoV-2 based on CDC data.**

|                            | COVID-19 Cases |                        | U.S. General Population |
|----------------------------|----------------|------------------------|-------------------------|
|                            | U.S. CDC Data  | Covid-Out Participants |                         |
| Female %                   | 53%            | 54%                    | 51%                     |
| Age, years (median)        | 36-41          | 46                     | 38.1                    |
| <b>Race (%)</b>            |                |                        |                         |
| Native American            | 1.1%           | 2.2%                   | 0.7%                    |
| Asian                      | 3.8%           | 3.8%                   | 5.6%                    |
| Hawaiian, Pacific Islander | 0.3%           | 0.6%                   | 0.2%                    |
| Black                      | 12.3%          | 7.3%                   | 12.5%                   |
| White                      | 54%            | 82%                    | 60.1%                   |
| <b>Ethnicity (%)</b>       |                |                        |                         |
| Latino                     | 25%            | 11%                    | 18.5%                   |

Overall representativeness of the trial: The COVID-OUT population had the expected percentage of females and a slightly older age than the general U.S. COVID-19 case population, likely due to the minimum age requirement of 30 years. The overall population of the COVID-OUT trial was similar in respect to the USA population and current COVID-19 population for persons self-identifying the following backgrounds: Native American, Asian, Hawaiian, Pacific Islander. The COVID-OUT population had a higher portion of individuals self-identifying as White and lower portions identifying as Black and Latino than both the US population and Covid-19 case population in the US. The COVID-OUT trial under-represents individuals identifying as Black and Latino.

## 5 Intention to treat (ITT) analyses

Participants who were randomized (i.e. intent-to-treat analysis), but who did not receive or start study medicine were not included in the modified intent to treat analysis.

**5.1 Table S6. Baseline characteristics of participants who were randomized but not included in the modified intention to treat analysis**

| Baseline Characteristics                 | Overall<br>n=1,323 | ITT and not<br>MITT<br>N=94 | Metformin        |                  | Ivermectin       |                  | Fluvoxamine      |                  |          |
|------------------------------------------|--------------------|-----------------------------|------------------|------------------|------------------|------------------|------------------|------------------|----------|
|                                          |                    |                             | Active<br>n=48   | Control<br>n=46  | Active<br>n=28   | Control<br>n=36  | Active<br>n=23   | Control<br>n=32  |          |
| Age, median (IQR)                        | 46 (37, 55)        | 46 (37, 55)                 | 45 (37, 55)      | 48 (40, 56)      | 44 (38, 55)      | 50 (37, 56)      | 46 (38, 54)      | 48 (36, 55)      |          |
| Female, % (n)                            | 56% (741)          | 47% (44)                    | 42% (20)         | 52% (24)         | 57% (16)         | 42% (15)         | 48% (11)         | 41% (13)         |          |
| Race, % (n)                              |                    |                             |                  |                  |                  |                  |                  |                  |          |
| Native American                          | 2.0% (27)          | 5.3% (5)                    | 6.2% (3)         | 4.3% (2)         | 0% (0)           | 5.6% (2)         | 13% (3)          | 6.2% (2)         |          |
| Asian                                    | 3.9% (51)          | 2.1% (2)                    | 2.1% (1)         | 2.2% (1)         | 0% (0)           | 2.8% (1)         | 4.3% (1)         | 3.1% (1)         |          |
| Hawaiian/Pacific Isl.                    | 0.7% (9)           | 0% (0)                      | 0% (0)           | 0% (0)           | 0% (0)           | 0% (0)           | 0% (0)           | 0% (0)           |          |
| Black                                    | 7.6% (100)         | 8.5% (8)                    | 10% (5)          | 6.5% (3)         | 3.6% (1)         | 5.6% (2)         | 13% (3)          | 6.2% (2)         |          |
| White                                    | 82% (1,091)        | 70% (66)                    | 67% (32)         | 74% (34)         | 89% (25)         | 67% (24)         | 57% (13)         | 62% (20)         |          |
| Other / Declined                         | 6.1% (80)          | 16.5% (15)                  | 16.2% (6)        | 15.2% (7)        | 7.2% (2)         | 19.3% (7)        | 21.3% (5)        | 21.5% (7)        |          |
| Ethnicity, n (%) Latinx                  | 12% (160)          | 12% (11)                    | 8.3% (4)         | 15% (7)          | 7.1% (2)         | 14% (5)          | 13% (3)          | 12% (4)          |          |
| <b>Medical history, insurance status</b> |                    |                             |                  |                  |                  |                  |                  |                  |          |
| BMI, median (IQR)                        | 29.8<br>(27, 34)   | 30.2<br>(27, 34)            | 28.2<br>(27, 32) | 31.0<br>(28, 35) | 30.1<br>(27, 34) | 29.6<br>(28, 37) | 30.4<br>(26, 33) | 29.6<br>(28, 37) |          |
| BMI ≥ 30 kg/m <sup>2</sup>               | 49% (646)          | 53% (50)                    | 44% (21)         | 63% (29)         | 54% (15)         | 50% (18)         | 57% (13)         | 50% (16)         |          |
| Cardiovascular disease*                  | 27% (353)          | 28% (26)                    | 33% (16)         | 22% (10)         | 25% (7)          | 22% (8)          | 30% (7)          | 19% (6)          |          |
| Diabetes                                 | 2.0% (26)          | 2.1% (2)                    | 2.1% (1)         | 2.2% (1)         | 3.6% (1)         | 0% (0)           | 4.3% (1)         | 0% (0)           |          |
| Vaccinated, primary series               | 52% (690)          | 46% (43)                    | 48% (23)         | 43% (20)         | 36% (10)         | 61% (22)         | 35% (8)          | 59% (19)         |          |
| Symptom Days, mean (±SD)                 | 4.8 (±1.9)         | 4.9 (1.8)                   | 4.4 (1.8)        | 5.3 (1.8)        | 4.3 (1.5)        | 4.9 (1.9)        | 5.4 (2.1)        | 5.0 (2.0)        |          |
| Symptoms ≤4 days                         | 47% (603)          | 42% (36)                    | 53% (24)         | 29% (12)         | 54% (14)         | 40% (14)         | 29% (6)          | 35% (11)         |          |
| Variant Period                           | Alpha              | 12% (159)                   | 11% (10)         | 8.3% (4)         | 13% (6)          | 7.1% (2)         | 5.6% (2)         | 4.3% (1)         | 6.2% (2) |
|                                          | Delta              | 66% (871)                   | 65% (61)         | 67% (32)         | 63% (29)         | 54% (15)         | 72% (26)         | 83% (19)         | 81% (26) |
|                                          | Omicron            | 22% (293)                   | 24% (23)         | 25% (12)         | 24% (11)         | 39% (11)         | 22% (8)          | 13% (3)          | 12% (4)  |
| Medicaid                                 | 15% (200)          | 16% (15)                    | 21% (10)         | 11% (5)          | 14% (4)          | 14% (5)          | 17% (4)          | 16% (5)          |          |
| Medicare                                 | 7.6% (100)         | 9.6% (9)                    | 6.2% (3)         | 13% (6)          | 11% (3)          | 5.6% (2)         | 13% (3)          | 6.2% (2)         |          |
| Private                                  | 62% (823)          | 51% (48)                    | 52% (25)         | 50% (23)         | 57% (16)         | 61% (22)         | 30% (7)          | 59% (19)         |          |
| No insurance                             | 13% (178)          | 22% (21)                    | 21% (10)         | 24% (11)         | 18% (5)          | 17% (6)          | 39% (9)          | 16% (5)          |          |

Values are n (%), median (interquartile range), or mean (±SD).

Abbreviations: BMI = body mass index; IQR=inter-quartile range; SD = standard deviation.

\* Cardiovascular disease defined as: hypertension, hyperlipidemia, coronary artery disease, past myocardial infarction, congestive heart failure, pacemaker, arrhythmias, or pulmonary hypertension.

## 5.2 Table S7: Intent-to-Treat (ITT) analysis of the primary outcome with imputation.

|                                                 | Metformin      |                 |                          | Ivermectin     |                 |                          | Fluvoxamine    |                 |                          |
|-------------------------------------------------|----------------|-----------------|--------------------------|----------------|-----------------|--------------------------|----------------|-----------------|--------------------------|
|                                                 | Active (n=711) | Control (n=706) | Adj. Odds Ratio (95% CI) | Active (n=438) | Control (n=434) | Adj. Odds Ratio (95% CI) | Active (n=357) | Control (n=359) | Adj. Odds Ratio (95% CI) |
| Primary Outcome                                 | 161/673 (23.9) | 188/674 (27.9)  | 0.838 (0.655 - 1.073)    | 109/416 (26.2) | 101/410 (24.6)  | 1.049 (0.763 - 1.443)    | 86/342 (25.1)  | 83/337 (24.3)   | 1.007 (0.709 - 1.429)    |
| Hypoxemia $\leq$ 93% Only                       | 153/670 (22.8) | 162/667 (24.3)  | 0.930 (0.721 - 1.200)    | 99/414 (23.9)  | 90/406 (22.2)   | 1.047 (0.753 - 1.457)    | 76/339 (22.4)  | 74/334 (22.2)   | 0.994 (0.693 - 1.427)    |
| Emergency dept visit, hospitalization, or death | 31/678 (4.6)   | 54/682 (7.9)    | 0.586 (0.372 - 0.925)    | 27/420 (6.4)   | 20/417 (4.8)    | 1.287 (0.705 - 2.350)    | 20/342 (5.8)   | 18/343 (5.8)    | 1.048 (0.537 - 2.048)    |
| Hospitalization or death                        | 11/678 (1.6)   | 24/682 (3.5)    | 0.479 (0.231 - 0.993)    | 8/420 (1.9)    | 8/417 (1.9)     | 0.897 (0.326 - 2.470)    | 8/342 (2.3)    | 8/343 (2.3)     | 0.898 (0.327 - 2.467)    |
| Death                                           | 1/686 (0.1)    | 0/679 (0.0)     |                          | 1/422 (0.2)    | 0/419 (0.0)     |                          | 0/342 (0.0)    | 0/344 (0.0)     |                          |

† Outcome reflects outcome defined as the corresponding component or worse.

Figures reflect # with event / # with known outcome (%) in ITT cohort. Adjusted Odds Ratio and 95% CI are based on a logistic regression model adjusted for baseline vaccination and other study drugs. Missing outcomes are multiply imputed. Abbreviation: Adj=adjusted

**Table S8: Complete case Intent-to-Treat analysis of the primary outcome without imputation.**

|                                                 | Metformin      |                 |                          | Ivermectin     |                 |                          | Fluvoxamine    |                 |                          |
|-------------------------------------------------|----------------|-----------------|--------------------------|----------------|-----------------|--------------------------|----------------|-----------------|--------------------------|
|                                                 | Active (n=711) | Control (n=706) | Adj. Odds Ratio (95% CI) | Active (n=438) | Control (n=434) | Adj. Odds Ratio (95% CI) | Active (n=357) | Control (n=359) | Adj. Odds Ratio (95% CI) |
| Primary Outcome                                 | 161/671 (24.0) | 188/67 (28.0)   | 0.838 (0.654 - 1.073)    | 109/415 (26.3) | 101/409 (24.7)  | 1.061 (0.773 - 1.457)    | 86/340 (25.3)  | 83/336 (24.7)   | 1.013 (0.712 - 1.442)    |
| Hypoxemia $\leq$ 93% Only                       | 153/668 (22.9) | 162/66 (24.4)   | 0.953 (0.737 - 1.231)    | 99/413 (24.0)  | 90/405 (22.2)   | 1.079 (0.776 - 1.499)    | 76/337 (22.6)  | 74/333 (22.2)   | 1.001 (0.694 - 1.445)    |
| Emergency dept visit, hospitalization, or death | 31/676 (4.6)   | 54/680 (7.9)    | 0.586 (0.37 - 0.928)     | 27/419 (6.4)   | 20/416 (4.8)    | 1.305 (0.716 - 2.38)     | 20/340 (5.9)   | 18/342 (5.3)    | 1.062 (0.543 - 2.078)    |
| Hospitalization or death                        | 11/675 (1.6)   | 24/680 (3.5)    | 0.482 (0.233 - 0.998)    | 8/419 (1.9)    | 8/416 (1.9)     | 0.923 (0.34 - 2.503)     | 8/340 (2.4)    | 8/342 (2.3)     | 0.912 (0.332 - 2.51)     |
| Death                                           | 1/682 (0.1)    | 0/677 (0.0)     |                          | 1/21 (0.2)     | 0/417 (0.0)     |                          | 0/340 (0.0)    | 0/342 (0.0)     |                          |

† Outcome reflects outcome defined as the corresponding component or worse.

Figures reflect the # with event / # with complete data (%) in ITT cohort. The number with incomplete data reported in parentheses reflects the number of people with a missing outcome or an unknown vaccination status (n=8). Abbreviation: Adj. = Adjusted

[Back to Top](#)

## 6 Data Safety Monitoring Board

**a. Catherine Benziger, MD, MPH**

*i. Director of Research, Essentia Health Heart and Vascular Center.*

**b. Hsin-Chieh Yeh, PhD**

*i. Associate Professor; Senior Epidemiologist of the Osler Housestaff Program; Director of General Internal Medicine - Welch Center Methods Core, Johns Hopkins University School of Medicine*

**c. Timothy Plante, MD, MHS**

*i. Assistant Professor, General Internal Medicine; Bloomfield Early Career Professor in Cardiovascular Research at the University of Vermont's Larner College of Medicine.*

**d. Anika Hines, PhD**

*i. Assistant Professor, Department of Health Behavior and Policy, Virginia Commonwealth University.*

**e. Eva Tseng, MD, MPH**

*i. Assistant Professor, General Internal Medicine; Core Faculty in the Welch Center for Prevention, Epidemiology, and Clinical Research, Johns Hopkins University School of Medicine*

**External study monitor:**

University of Minnesota Clinical & Translational Science Institute (CTSI) supported via NIH National Center for Advancing Translational Sciences (NCATS) UL1TR002494.

[Back to Top](#)

## 7. Investigational Drug Services Datasheet

University of Minnesota Medical Center, Fairview  
Department of Pharmaceutical Services

IDS# 5812

IRB# Advarra MET29324

IND# 152439

1. **Drug Name: Metformin, Fluvoxamine, Ivermectin; COVID-OUT:** Outpatient Treatment for SARS-CoV-2 Infection, a Factorial Randomized Clinical Trial.
2. **Synonyms:**  
COVID-OUT Protocol version 3.1 dated 05 April 2021
3. **Dosage Form(s) and Strength(s):**  
**Metformin** 500mg immediate release tablet and matching placebo  
**Fluvoxamine** 50mg tablet and matching placebo  
**Ivermectin** 7mg, 14 mg tablets and matching placebo
4. **Study Medication Description:**  
**Metformin** 500mg immediate release tablet and identical matching placebo  
**Fluvoxamine** 50mg tablet and identical matching placebo  
**Ivermectin** 7mg, 14 mg tablets and identical matching placebo
5. **Usual Therapeutic Dose:** *All dosing will begin with the evening dose on Day 1.*  
**Subjects will be randomized 1:1:1:1:1:1 to one of the following six arms:**
  - 1) **Metformin** and placebo for ivermectin
  - 2) **Metformin** and **Fluvoxamine**
  - 3) **Metformin** and **Ivermectin**
  - 4) **Fluvoxamine** and placebo for ivermectin
  - 5) **Ivermectin** and placebo for fluvoxamine
  - 6) Placebo for metformin and placebo for fluvoxamine

**Metformin or matching placebo:** 500mg once on Day 1, ideally in the PM; 500mg in the AM and PM of Days 2-5; and 500mg in the AM and 1,000mg in the PM of Days 6-14.

**Fluvoxamine or matching placebo:** 50mg twice per day, approximately every 12 hours, for 14 days.

**Ivermectin or matching placebo:** for 3 days

|                  |                                  |
|------------------|----------------------------------|
| Less than 74kg   | 28 mg once daily (2 x 14mg)      |
| 74 to < 88kg     | 35mg once daily (2 x 14mg + 7mg) |
| 88 to < 106kg    | 42mg once daily (3 x 14)         |
| 106 to < 124kg   | 49mg once daily (3 x 14mg + 7mg) |
| 124kg to < 160kg | 56mg once daily (4 x 14mg)       |
| ≥ 160 kg         | 63mg once daily (4 x 14mg + 7mg) |

There is a pregnant women sub-study for subjects 18 years and older. There is a separate group of blinded study packs for pregnant women containing only metformin or placebo. This will be packaged in **prescription vials**, not in pill minders.

[Back to Top](#)

6. **Usual Dosage Range:** If subjects experience moderate or moderate-substantial side effects that they find intolerable, they can break tablets in half. Communication with study team is required.
7. **Location of Drug Supply and Dose Preparation/Storage Conditions:** IDS Pharmacy; store all agents at room temperature up to 30°C.
8. **Temperature Excursion Management:** Handle study drugs as per the package insert for each commercial medication.
9. **Expected Therapeutic Effect(s):** The primary objectives of the trial are:
  - 1) To understand whether metformin vs fluvoxamine vs ivermectin vs metformin + fluvoxamine vs metformin + ivermectin are superior to placebo in non-hospitalized adults with SARS-CoV-2 infection for preventing COVID-19 disease progression.
  - 2) To understand if the active treatment arms are superior to placebo in improving viral load, serologic markers associated with Covid-19, and gut microbiome in non-hospitalized adults with SARS-CoV-2 infection.
  - 3) To understand if any of the active treatment arms prevent long-covid syndrome, PASC (post-acute sequelae of SARS-CoV-2 infection).
10. **Possible Adverse Effects:** per commercial literature
11. **Drug Interactions:** per commercial literature
12. **Reconstitution Directions:** not applicable
13. **Save used and partial vials (Method of Destruction):** Study subjects should report any unused drug to the study team. Nothing is returned to the pharmacy.
14. **Route and Rate of Administration:**

**Ivermectin or matching placebo** should be taken by mouth on an empty stomach with water. 1 hour before or 2 hours after a meal.

All other agents should be taken by mouth at the end of a balanced snack or small meal.
15. **Special Instructions:**

Fairview IDS Pharmacy will oversee the pre-packaging of the study drug into 2-week AM/PM pill packs. The pill packs will be placed in opaque packing so that the research study staff will remain blinded to the contents in the pill boxes. The pill packs will contain a unique identifier. Pill packs will expire 6 months from the date of preparation or the earliest expiration date of the ingredients, whichever is sooner.

IDS will provide these pre-packaged, uniquely identified study pill packs to and the local study team and participating sites.

Participants will be assigned a packet number according to the randomization. Packet numbers are coded by site (e.g. UMN site 01-XXX, Hennepin site 02-XXX, etc.). The

[Back to Top](#)



pharmacy team involved will be unblinded to packet randomization. All other members of the clinical care team and the participants will be blinded to treatment allocation.

The research staff will select the pill pack based on the randomization code that preserves blinding, place the patient's name and study ID on the opaque packing, place it in the study kit for that patient and arrange for delivery of the kit.

***Emergency unblinding plan***

Each participating pharmacy team will hold the blind for their site. Each site will have 24-hour access to the blind. Each subject will be provided information as to whom to contact for unblinding information in the event of an emergency. There is one unblinded statistician with two unblinded supporting statisticians on the study team.

University of Minnesota IDS Pharmacy will also have an unblinding key available as a backup for other sites. Call xxx-xxx-xxxx to access unblinding information at the University of Minnesota.

**16. Medication Re-supply Information:**

IDS has purchased commercial metformin and fluvoxamine for study use. Placebo for metformin has been prepared by Green Mountain Pharmacy. Placebo for fluvoxamine will be provided by Apotex. Ivermectin and placebo will be provided by Edenbridge Pharma

**17. Principal Investigator/Telephone Number:** Dr. Carolyn Bramante

**18. Authorized Physicians/Telephone Number:** \_\_\_\_

**19. Study Coordinator/Telephone Number:** \_\_\_\_

**20. Date:** 21 April 2021  
**Update:** 24 May 2021 (Section 5)

**21. Prepared/verified by:** \_\_\_\_\_  
**Updated by:** \_\_\_\_\_

**Prior to dispensing study medication pharmacists are responsible for information contained on the datasheet and must sign the training log.**

[Back to Top](#)

## 8. Acknowledgements

We thank the participants in the trial. We would also like to thank many others who made this trial possible, including: The M Health Fairview Obesity Medicine Research Advisory Panel, particularly Stacy Dean and Yelena Kibasova. The numerous volunteers who helped fold and tape boxes and place labels so that the study team could focus on enrollment and follow-up. Volunteers include: Stacy Washington, Ben Tsech, Sasha Fraser, Evan Fraser, Piotr Bednarski, Paloma Good, Josie June Veit.

University of Minnesota, M Health Fairview: Program in Health Disparities Research; Clinical and Translational Science Institute's (CTSI) Best Practices Integrated Informatics Core (BPIC); Medical School Communications; M Health Fairview Recruiting Office; Department of Surgery Clinical Trials Office; Fairview Investigational Drug Services Pharmacy; Sponsored Projects Administration; Advanced Research and Diagnostic Laboratory; Center for Pediatric Obesity Medicine; UMN Institute for Engineering in Medicine; CTSI Regulatory support; Department of Medicine Research Operations and Division of General internal Medicine, especially Jill Charles, Manuria Yang, and Kate Brekke.

Dr. Bramante thanks her KL2 and K23 mentors for their continued career mentorship and support: Anne Joseph, MD, MPH; Aaron Kelly, PhD; Claudia Fox, MD, MPH; and Kimberly Gudzone, MD, MPH.

Dr. Bramante thanks the M Health Fairview Learning Health Systems career development program and mentors Genevieve Melton-Meaux, MD, PhD and Bradley Benson, MD; and Fairview Research Services, especially Andrew Snyder and Jill Cordes. Dr. Bramante also thanks other colleagues and mentors who contributed to considerations for the protocol: Eric Lenze, MD; Angela Reiersen, MD; David Haynes, PhD; Ildilko Linvay, MD; Ana Palacio, MD; Leonardo Tamariz, MD, MPH; Ananth Shalev, MD; Erik Anderson, MD; and Jeanne M. Clark, MD, MPH.

The trial was designed by CB with significant support and help at all stages from all co-authors. The manuscript was written by CB and DRB. Analyses were performed by JH and TM with assistance from JP, SL, and LS.

## 9. Appendix References

1. Wong WW, Strizich G, Heo M, et al. Relationship between body fat and BMI in a US hispanic population-based cohort study: Results from HCHS/SOL. *Obesity* (Silver Spring) 2016;24:1561-71.
2. Jensen MD, Ryan DH, Apovian CM, et al. 2013 AHA/ACC/TOS guideline for the management of overweight and obesity in adults: a report of the American College of Cardiology/American Heart Association Task Force on Practice Guidelines and The Obesity Society. *J Am Coll Cardiol* 2014;63:2985-3023.
3. Obesity Prevention Source. Abdominal Obesity Measurement Guidelines for Different Ethnic Groups. (Accessed 28 February, 2022, at <https://www.hsph.harvard.edu/obesity-prevention-source/waist-circumference-guidelines-for-different-ethnic-groups/>.)

[Back to Top](#)

4. Zhao W. Mass weighted urn design--A new randomization algorithm for unequal allocations. *Contemp Clin Trials* 2015;43:209-16.
5. Reis G, Dos Santos Moreira-Silva EA, Silva DCM, et al. Effect of early treatment with fluvoxamine on risk of emergency care and hospitalisation among patients with COVID-19: the TOGETHER randomised, platform clinical trial. *Lancet Glob Health* 2022;10:e42-e51.
6. Food and Drug Administration. COVID-19: Developing Drugs and Biological Products for Treatment or Prevention Guidance for Industry. 2021. (Accessed 1 Nov, 2021, at <https://www.fda.gov/regulatory-information/search-fda-guidance-documents/covid-19-developing-drugs-and-biological-products-treatment-or-prevention>.)
7. FDA. Pulse Oximeter Accuracy and Limitations: FDA Safety Communication 2021. (Accessed 21 Feb, 2021, at <https://www.fda.gov/medical-devices/safety-communications/pulse-oximeter-accuracy-and-limitations-fda-safety-communication>.)
8. Pocock SJ, Stone GW. The Primary Outcome Fails — What Next? *New England Journal of Medicine* 2016;375:861-70.
9. Sjoding MW, Dickson RP, Iwashyna TJ, Gay SE, Valley TS. Racial Bias in Pulse Oximetry Measurement. *New England Journal of Medicine* 2020;383:2477-8.
10. Sterne JA, White IR, Carlin JB, et al. Multiple imputation for missing data in epidemiological and clinical research: potential and pitfalls. *BMJ* 2009;338:b2393.
11. van Buuren S, Groothuis-Oudshoorn K. mice: Multivariate Imputation by Chained Equations in R. *Journal of Statistical Software* 2011;45:1 - 67.
12. Van Buuren S. Flexible imputation of missing data. Boca Raton, FL: CRC press; 2018.
13. Meng XL, Rubin DB. Performing Likelihood Ratio Tests with Multiply-Imputed Data Sets. *Biometrika* 1992;79:103-11.
14. Rubin DB. Multiple Imputation for Nonresponse in Surveys. New York: Wiley; 1987.
15. Henry RR, Frias JP, Walsh B, et al. Improved glycemic control with minimal systemic metformin exposure: Effects of Metformin Delayed-Release (Metformin DR) targeting the lower bowel over 16 weeks in a randomized trial in subjects with type 2 diabetes. *PloS one*. 2018;13(9):e0203946
16. Xu L, Wang X, Chen Y, et al. Metformin Modulates T Cell Function and Alleviates Liver Injury Through Bioenergetic Regulation in Viral Hepatitis. *Frontiers in Immunology* 2021;12: 638575. doi: 10.3389/fimmu.2021.638575.
17. Böhme, J., Martinez, N., Li, S. et al. Metformin enhances anti-mycobacterial responses by educating CD8+ T-cell immunometabolic circuits. *Nat Commun* 202; 11: 5225.
18. Facente SN, Reiersen AM, Lenze EJ, Boulware DR, Klausner JD. Fluvoxamine for the Early Treatment of SARS-CoV-2 Infection: A Review of Current Evidence. *Drugs*. 2021; 81: 2081-9.

[Back to Top](#)
